# Supplementary material for: Brønsted acidic ionic liquid-catalyzed tandem reaction: an efficient and sustainable approach towards the regioselective synthesis and molecular docking studies of 4-hydroxycoumarin-substituted indoles bearing lower E-factors
Source: Royal Society of Chemistry journal article supplement (doi:10.1039/d2ob01431a), 2022-01-01
Supplement: d2ob01431a1.pdf [file d2ob01431a1.pdf]

## Electronic Supplementary Information

### **Brønsted acidic ionic liquid-catalyzed tandem reaction: An efficient and sustainable approach towards regioselective synthesis and molecular docking studies of 4-hydroxycoumarin-substituted indoles bearing lower E-factors**

Satyajit Samanta,<sup>a</sup> Rana Chatterjee,<sup>a</sup> Subhankar Sarkar,<sup>a</sup> Satyajit Pal,<sup>a</sup> Anindita Mukherjee,<sup>b</sup> Ilya I. Butorin,<sup>b</sup> Olga A. Konovalova,<sup>b</sup> Sougata Santra,<sup>b</sup> Grigory V. Zyryanov<sup>bc</sup> and Adinath Majee\*<sup>a</sup>

<sup>a</sup>*Department of Chemistry, Visva-Bharati (A Central University), Santiniketan, 731235, India. Email: [adinath.majee@visva-bharati.ac.in](mailto:adinath.majee@visva-bharati.ac.in)*

<sup>b</sup>*Department of Organic and Biomolecular Chemistry, Chemical Engineering Institute, Ural Federal University, 19 Mira Street, 620002, Yekaterinburg, Russian Federation.*

<sup>c</sup>*I. Ya. Postovskiy Institute of Organic Synthesis, Ural Division of the Russian Academy of Sciences, 22 S. Kovalevskoy Street, 620219 Yekaterinburg, Russian Federation.*

## **Table of Contents**

| <b>Section</b>                          | <b>Page No.</b> |
|-----------------------------------------|-----------------|
| 1. E-factor calculation                 | S3              |
| 2. NMR spectra of synthesized compounds | S4- S34         |

## 1. E-factor calculation:

For **4a**:  $E = (0.353\text{g} - 0.300\text{g})/0.300\text{g} = 0.176$

For **4b**:  $E = (0.367\text{g} - 0.301\text{g})/0.301\text{g} = 0.219$

For **4c**:  $E = (0.383\text{g} - 0.283\text{g})/0.383\text{g} = 0.353$

For **4d**:  $E = (0.431\text{g} - 0.345\text{g})/0.345\text{g} = 0.249$

For **4e**:  $E = (0.387\text{g} - 0.279\text{g})/0.279\text{g} = 0.387$

For **4f**:  $E = (0.381\text{g} - 0.297\text{g})/0.297\text{g} = 0.282$

For **4g**:  $E = (0.397\text{g} - 0.345\text{g})/0.345\text{g} = 0.150$

For **4h**:  $E = (0.413\text{g} - 0.372\text{g})/0.372\text{g} = 0.110$

For **4i**:  $E = (0.443\text{g} - 0.310\text{g})/0.310\text{g} = 0.429$

For **4j**:  $E = (0.402\text{g} - 0.317\text{g})/0.317\text{g} = 0.268$

For **4k**:  $E = (0.397\text{g} - 0.349\text{g})/0.349\text{g} = 0.137$

For **4l**:  $E = (0.459\text{g} - 0.385\text{g})/0.385\text{g} = 0.192$

For **4m**:  $E = (0.477\text{g} - 0.430\text{g})/0.430\text{g} = 0.109$

For **4n**:  $E = (0.461\text{g} - 0.397\text{g})/0.397\text{g} = 0.161$

For **4o**:  $E = (0.417\text{g} - 0.363\text{g})/0.363\text{g} = 0.148$

## **2. $^1\text{H}$ , and $^{13}\text{C}$ NMR spectra of synthesized compounds**

1H of VBSAS-200/9P

8.818  
7.801  
7.798  
7.788  
7.781  
7.778  
7.567  
7.563  
7.546  
7.528  
7.524  
7.443  
7.436  
7.433  
7.424  
7.359  
7.338  
7.330  
7.309  
7.298  
7.278  
7.259  
7.239  
7.226  
7.213  
7.213  
7.194  
7.161  
7.143  
7.124  
7.092  
7.073  
7.055

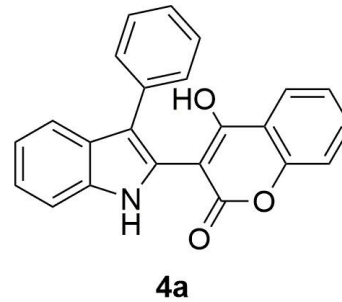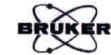

Current Data Parameters  
NAME Dr. A MAJEE 2021  
EXPNO 84  
PROCNO 1

F2 - Acquisition Parameters  
Date\_ 20210209  
Time\_ 18.23  
INSTRUM spect  
PROBHD 5 mm PABBO BB/  
PULPROG zg30  
TD 32768  
SOLVENT CDC13  
NS 8  
DS 1  
SWH 8223.685 Hz  
FIDRES 0.250967 Hz  
AQ 1.9922944 sec  
RG 120.16  
DW 60.800 usec  
DE 6.50 usec  
TE 295.1 K  
D1 1.0000000 sec  
TD0 1

===== CHANNEL f1 =====  
SFO1 400.1524711 MHz  
NUC1 1H  
P1 14.75 usec  
PLW1 12.00000000 W

F2 - Processing parameters  
SI 16384  
SF 400.1500350 MHz  
WDW EM  
SSB 0  
LB 0.30 Hz  
GB 0  
PC 2.00

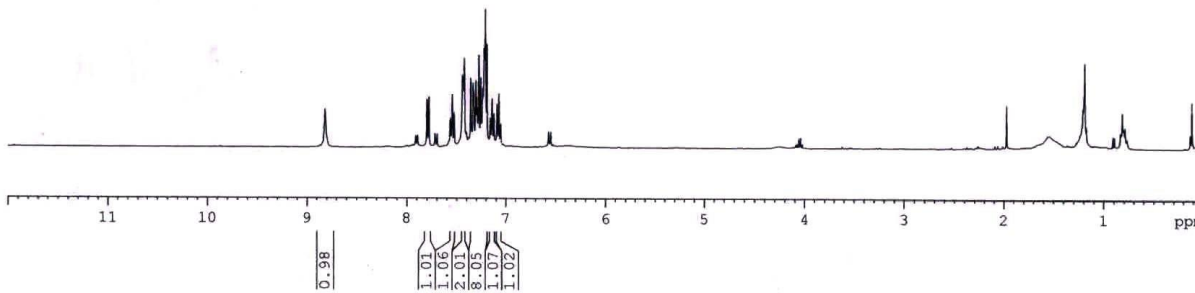

13C of VBSAS-200/9P

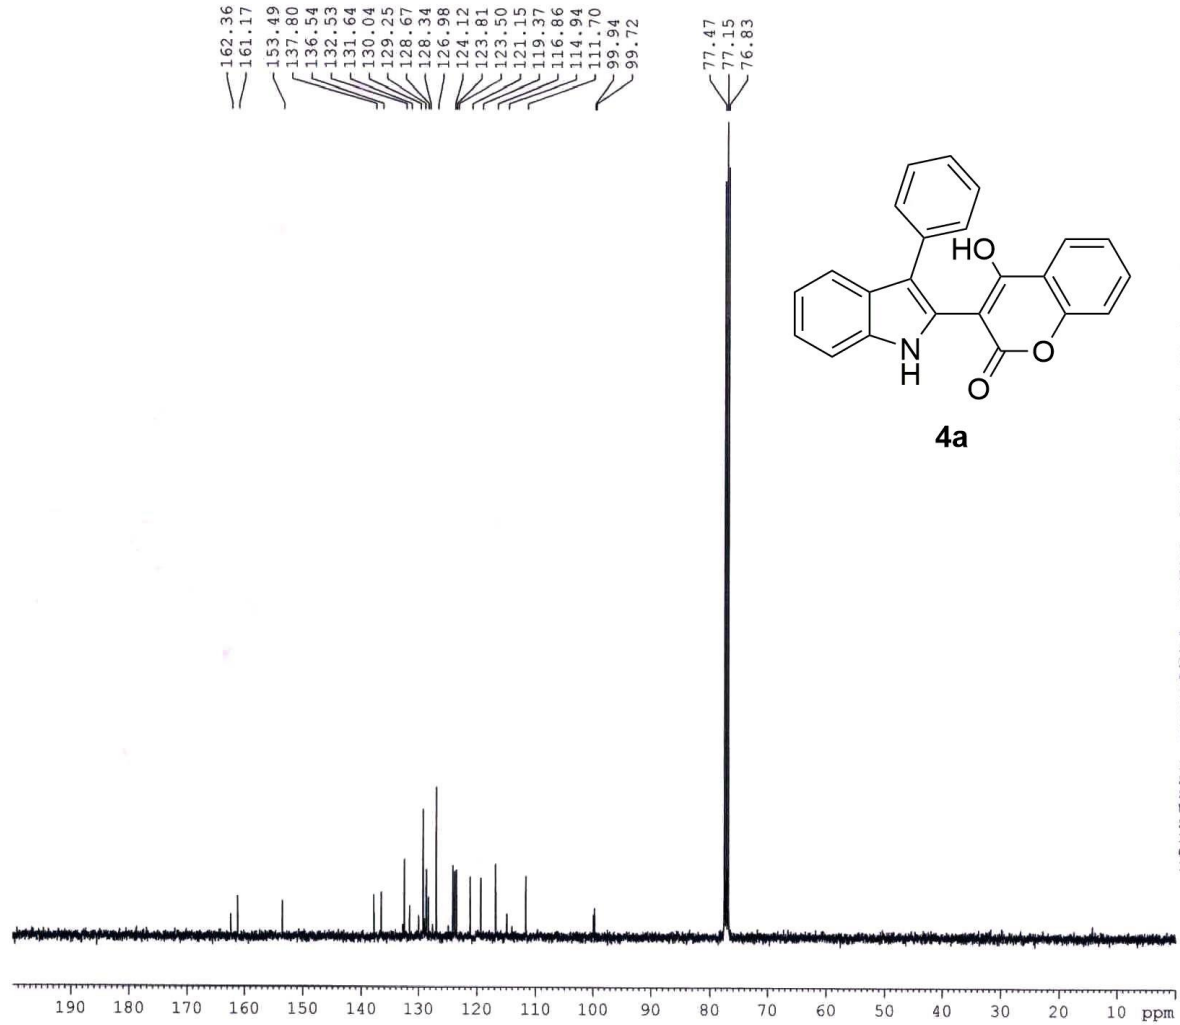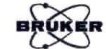

Current Data Parameters  
NAME Dr. A MAJEE 2021  
EXPNO 85  
PROCNO 1

F2 - Acquisition Parameters  
Date\_ 20210209  
Time 18.54  
INSTRUM spect  
PROBHD 5 mm PABBO BB/  
PULPROG zgpg30  
TD 32768  
SOLVENT CDCl3  
NS 640  
DS 2  
SWH 24038.461 Hz  
FIDRES 0.733596 Hz  
AQ 0.6815744 sec  
RG 120.16  
DW 20.800 usec  
DE 6.50 usec  
TE 295.6 K  
D1 2.00000000 sec  
D11 0.03000000 sec  
TDO 1

===== CHANNEL f1 =====  
SFO1 100.6278588 MHz  
NUC1 13C  
P1 8.90 usec  
PLW1 54.00000000 W

===== CHANNEL f2 =====  
SFO2 400.1516006 MHz  
NUC2 1H  
CPDPRG2 waltz16  
PCPD2 90.00 usec  
PLW2 12.00000000 W  
PLW12 0.32231000 W  
PLW13 0.16212000 W

F2 - Processing parameters  
SI 16384  
SF 100.6177858 MHz  
WDW EM  
SSB 0  
LB 1.00 Hz  
GB 0  
PC 1.40

1H of VBSS-T-52

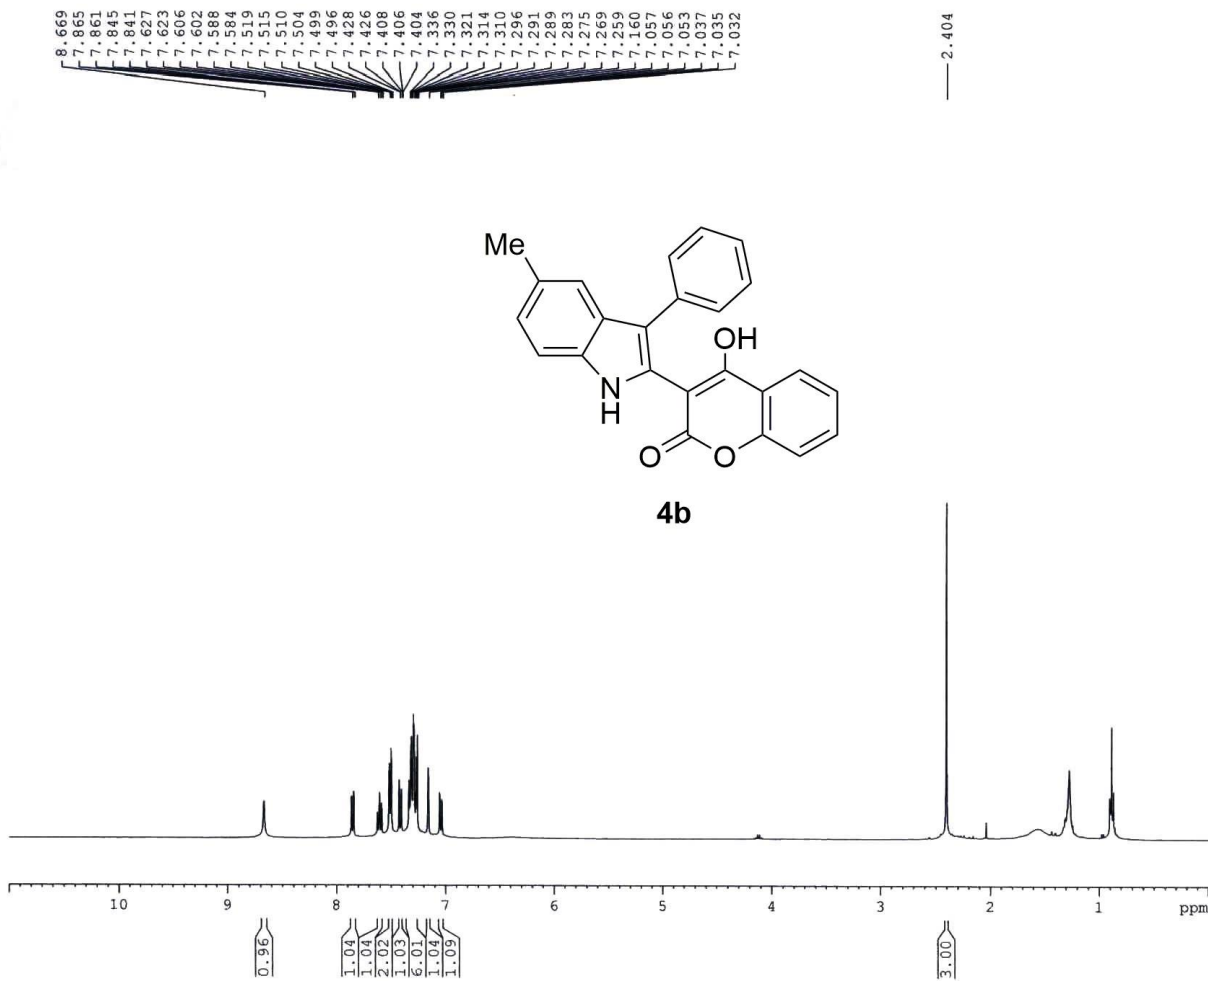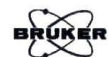

Current Data Parameters  
NAME Dr. A MAJEE 2020  
EXPNO 276  
PROCNO 1

F2 - Acquisition Parameters  
Date\_ 20200318  
Time\_ 10.42  
INSTRUM spect  
PROBHD 5 mm PABBO BB/  
PULPROG zg30  
TD 32768  
SOLVENT CDCl3  
NS 8  
DS 1  
SWH 8223.685 Hz  
FIDRES 0.250967 Hz  
AQ 1.9922944 sec  
RG 135.7  
DW 60.800 usec  
DE 6.50 usec  
TE 303.2 K  
D1 1.00000000 sec  
TDO 1

===== CHANNEL f1 =====  
SFO1 400.1524711 MHz  
NUC1 1H  
P1 14.75 usec  
PLW1 12.00000000 W

F2 - Processing parameters  
SI 16384  
SF 400.1500092 MHz  
WDW EM  
SSB 0  
LB 0.30 Hz  
GB 0  
PC 2.00

13C of VBSS-T-52

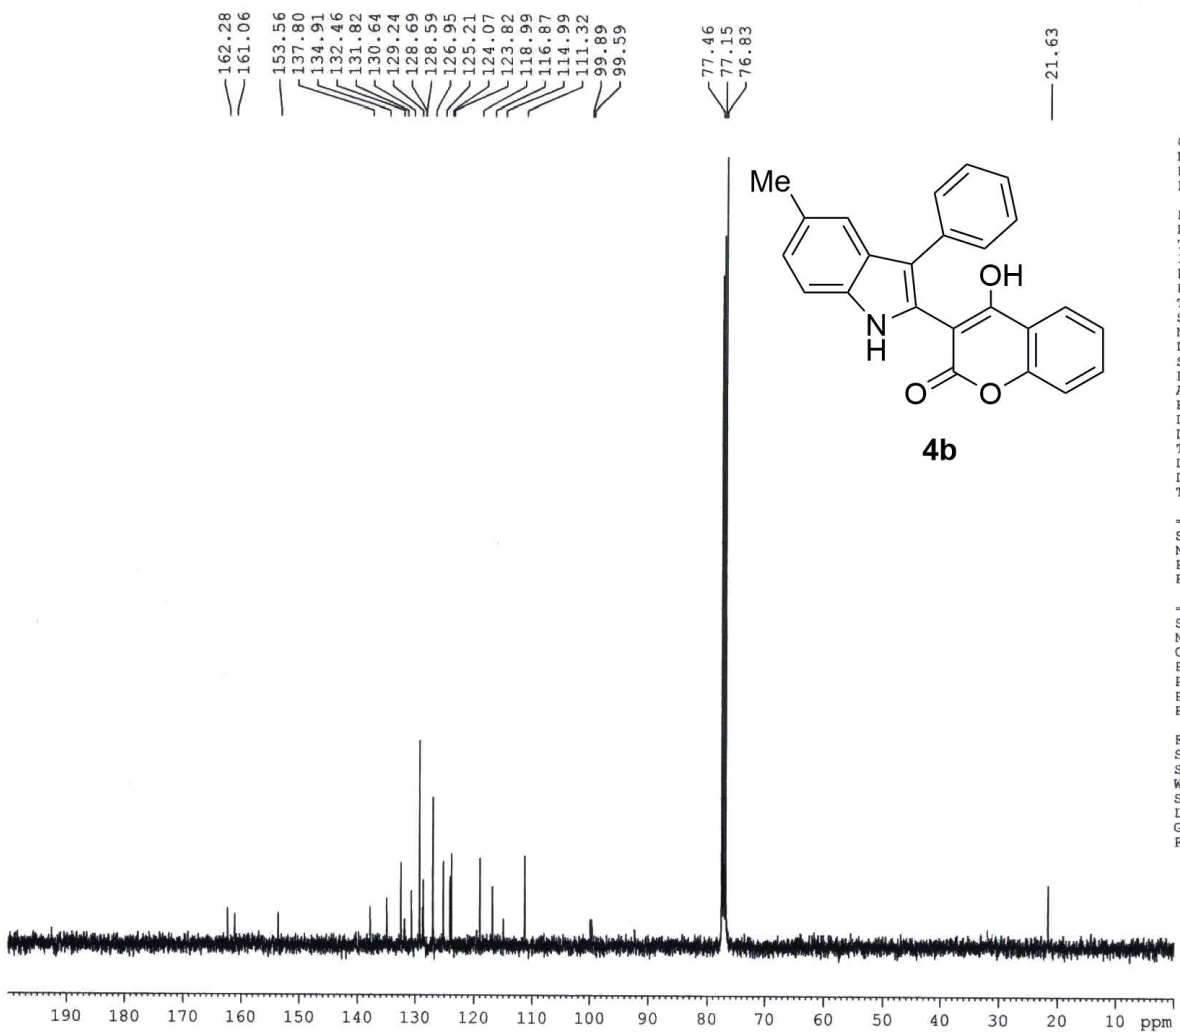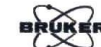

Current Data Parameters  
NAME Dr. A MAJEE 2020  
EXPNO 277  
PROCNO 1

F2 - Acquisition Parameters  
Date 20200318  
Time 11.17  
INSTRUM spect  
PROBHD 5 mm PABBO BB/  
PULPROG zgpg30  
TD 32768  
SOLVENT CDCl3  
NS 528  
DS 2  
SWH 24038.461 Hz  
FIDRES 0.733596 Hz  
AQ 0.6815744 sec  
RG 135.7  
DW 20.800 usec  
DE 6.50 usec  
TE 303.2 K  
D1 2.00000000 sec  
D11 0.03000000 sec  
TD0 1

----- CHANNEL f1 -----  
SFO1 100.6278588 MHz  
NUC1 13C  
P1 8.90 usec  
PLW1 54.00000000 W

----- CHANNEL f2 -----  
SFO2 400.1516006 MHz  
NUC2 1H  
CPDPRG12 waltz16  
PCPD2 90.00 usec  
PLW2 12.00000000 W  
PLW12 0.32231000 W  
PLW13 0.16212000 W

F2 - Processing parameters  
SI 16384  
SF 100.6177828 MHz  
WDW EM  
SSB 0  
LB 1.00 Hz  
GB 0  
PC 1.40



1H of VBSAS-200/8

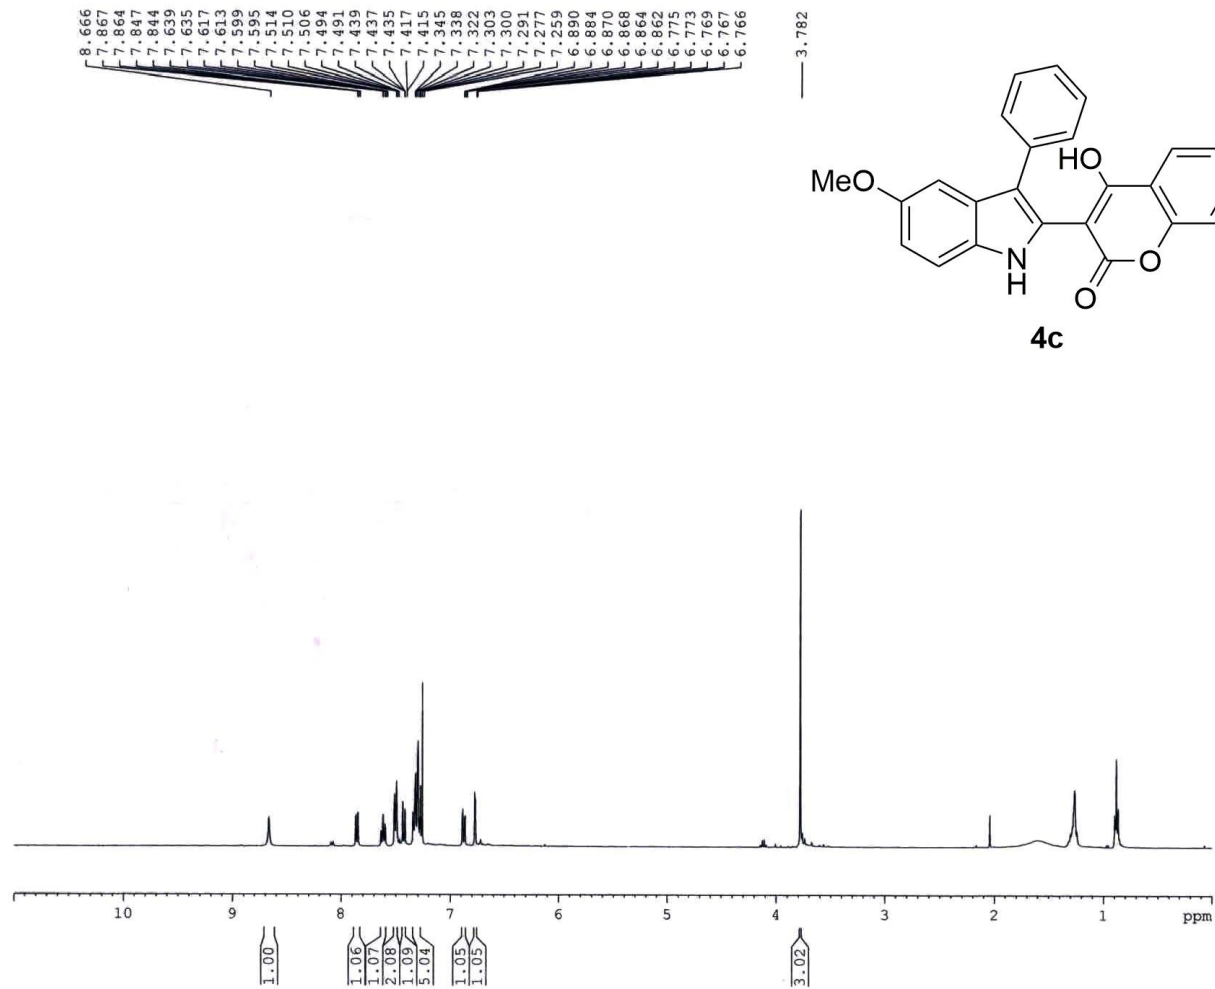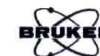

Current Data Parameters  
NAME Dr. A MAJEE 2020  
EXPNO 568  
PROCNO 1

F2 - Acquisition Parameters  
Date\_ 20201217  
Time 15.37  
INSTRUM spect  
PROBHD 5 mm PABBO BB/  
PULPROG zg30  
TD 32768  
SOLVENT CDCl3  
NS 8  
DS 1  
SWH 8223.685 Hz  
FIDRES 0.250967 Hz  
AQ 1.9922944 sec  
RG 186.42  
DW 60.800 usec  
DE 6.50 usec  
TE 295.0 K  
D1 1.00000000 sec  
TD0 1

----- CHANNEL f1 -----  
SF01 400.1524711 MHz  
NUC1 1H  
P1 14.75 usec  
PLW1 12.00000000 W

F2 - Processing parameters  
SI 16384  
SF 400.1500092 MHz  
WDW EM  
SSB 0  
LB 0.30 Hz  
GB 0  
PC 2.00

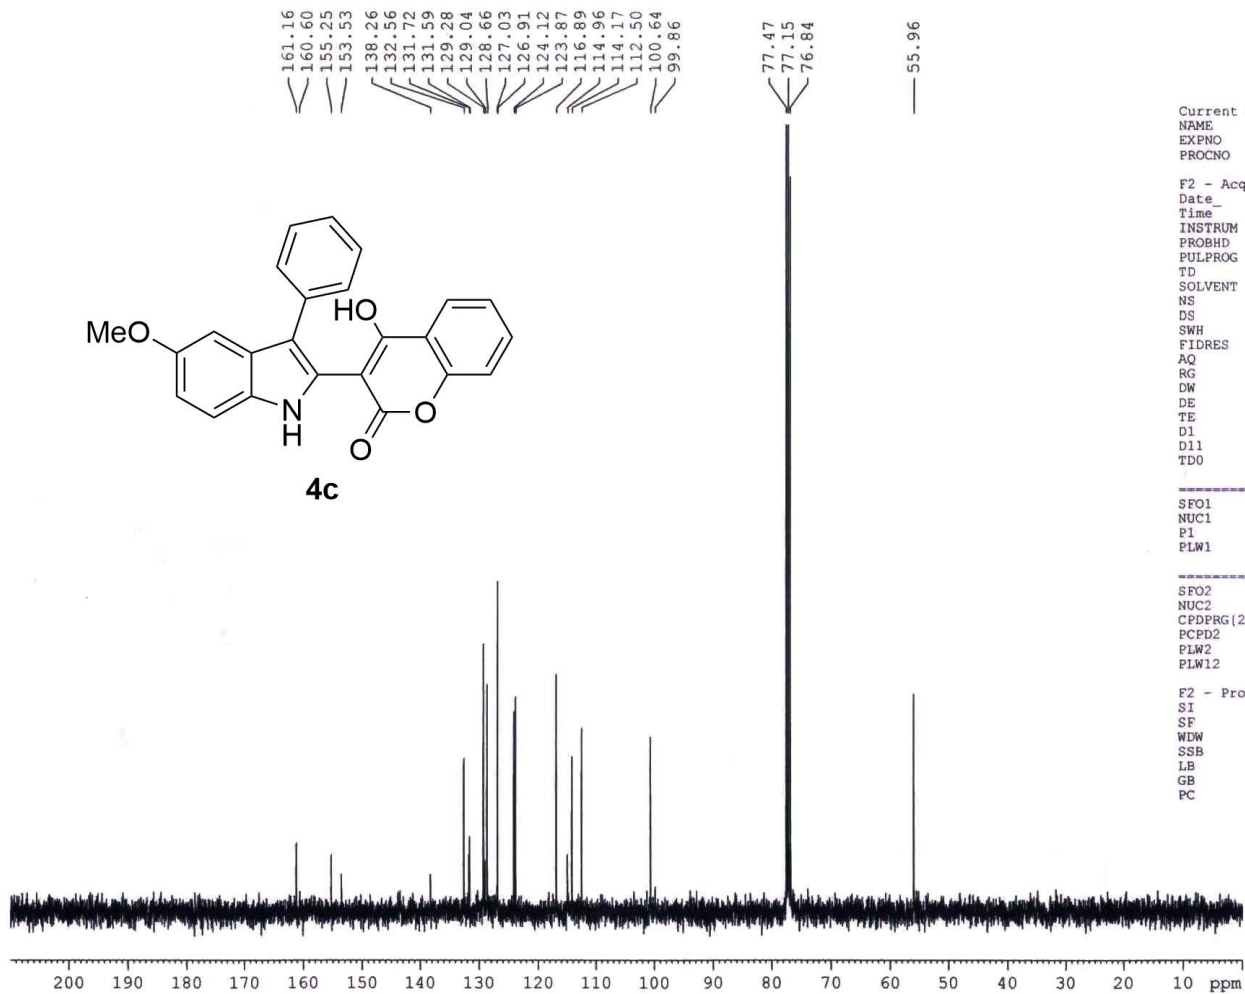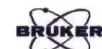

Current Data Parameters  
 NAME Dr. A MAJEE 2020  
 EXPNO 569  
 PROCNO 1

F2 - Acquisition Parameters  
 Date\_ 20201217  
 Time 16.11  
 INSTRUM spect  
 PROBHD 5 mm PABBO BB/  
 PULPROG zgdc  
 TD 32768  
 SOLVENT CDCl3  
 NS 680  
 DS 2  
 SWH 24038.461 Hz  
 FIDRES 0.733596 Hz  
 AQ 0.6815744 sec  
 RG 186.42  
 DW 20.800 usec  
 DE 6.50 usec  
 TE 295.9 K  
 D1 2.00000000 sec  
 D11 0.03000000 sec  
 TD0 1

----- CHANNEL f1 -----  
 SFO1 100.6278588 MHz  
 NUC1 13C  
 P1 8.90 usec  
 PLW1 54.00000000 W

----- CHANNEL f2 -----  
 SFO2 400.1516006 MHz  
 NUC2 1H  
 CPDPRG[2] waltz16  
 PCPD2 90.00 usec  
 PLW2 12.00000000 W  
 PLW12 0.32231000 W

F2 - Processing parameters  
 SI 16384  
 SF 100.6177844 MHz  
 WDW EM  
 SSB 0  
 LB 1.00 Hz  
 GB 0  
 PC 1.00

1H of VBSAS-200/1

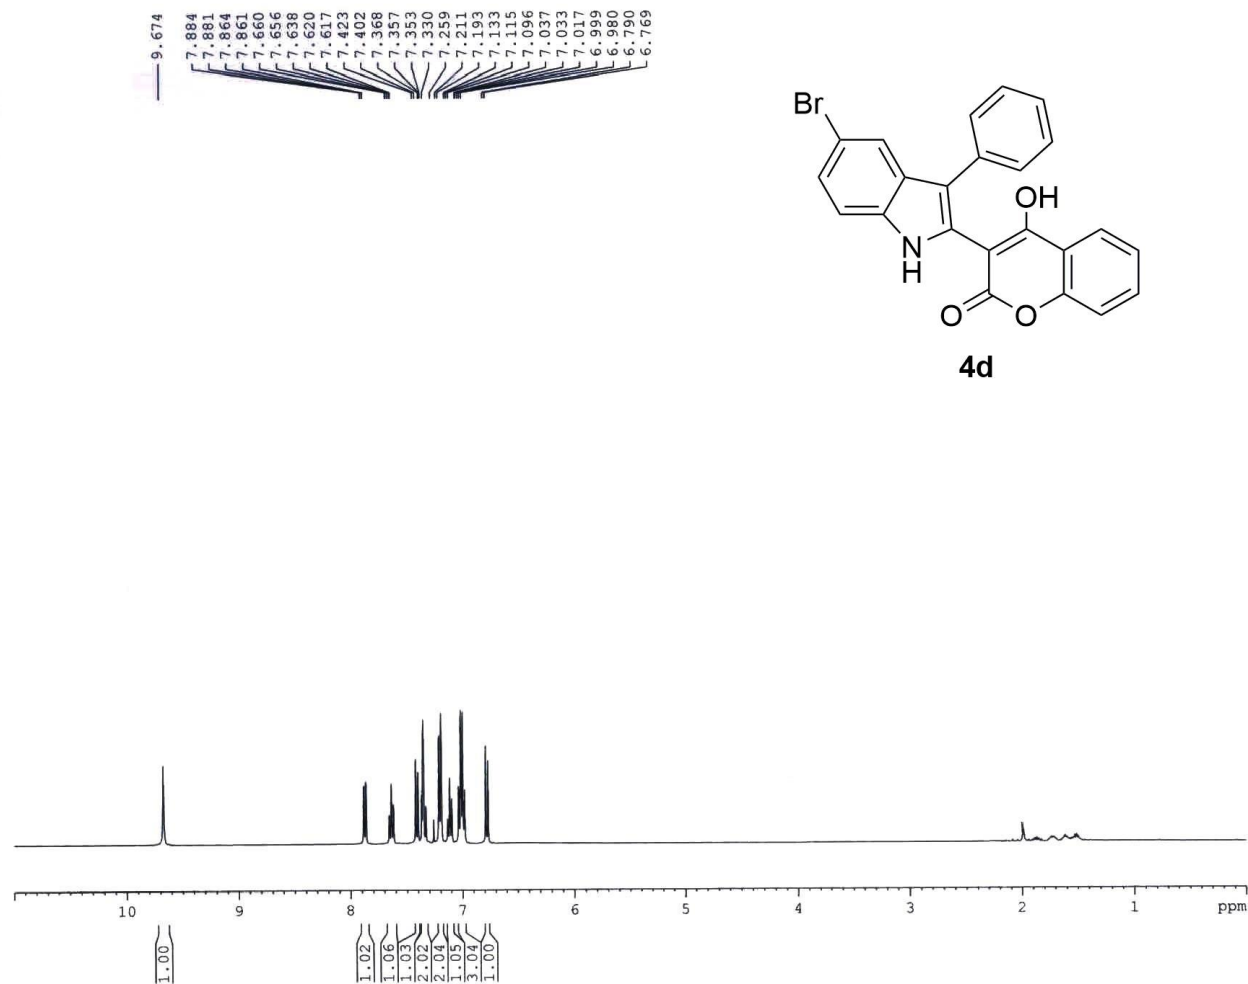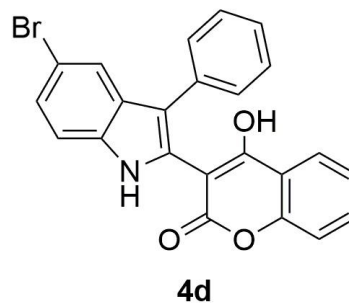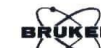

Current Data Parameters  
NAME Dr. A MAJEE 2020  
EXPNO 534  
PROCNO 1

F2 - Acquisition Parameters  
Date\_ 20201129  
Time\_ 15.36  
INSTRUM spect  
PROBHD 5 mm PABBO BB/  
PULPROG zg30  
TD 32768  
SOLVENT CDC13  
NS 8  
DS 1  
SWH 8223.685 Hz  
FIDRES 0.250967 Hz  
AQ 1.9922944 sec  
RG 54.07  
DW 60.800 usec  
DE 6.50 usec  
TE 297.6 K  
D1 1.00000000 sec  
TDO 1

===== CHANNEL f1 =====  
SFO1 400.1524711 MHz  
NUC1 1H  
P1 14.75 usec  
PLW1 12.00000000 W

F2 - Processing parameters  
SI 16384  
SF 400.1500092 MHz  
WDW EM  
SSB 0  
LB 0.30 Hz  
GB 0  
PC 2.00

13C of VBSAS-200/1

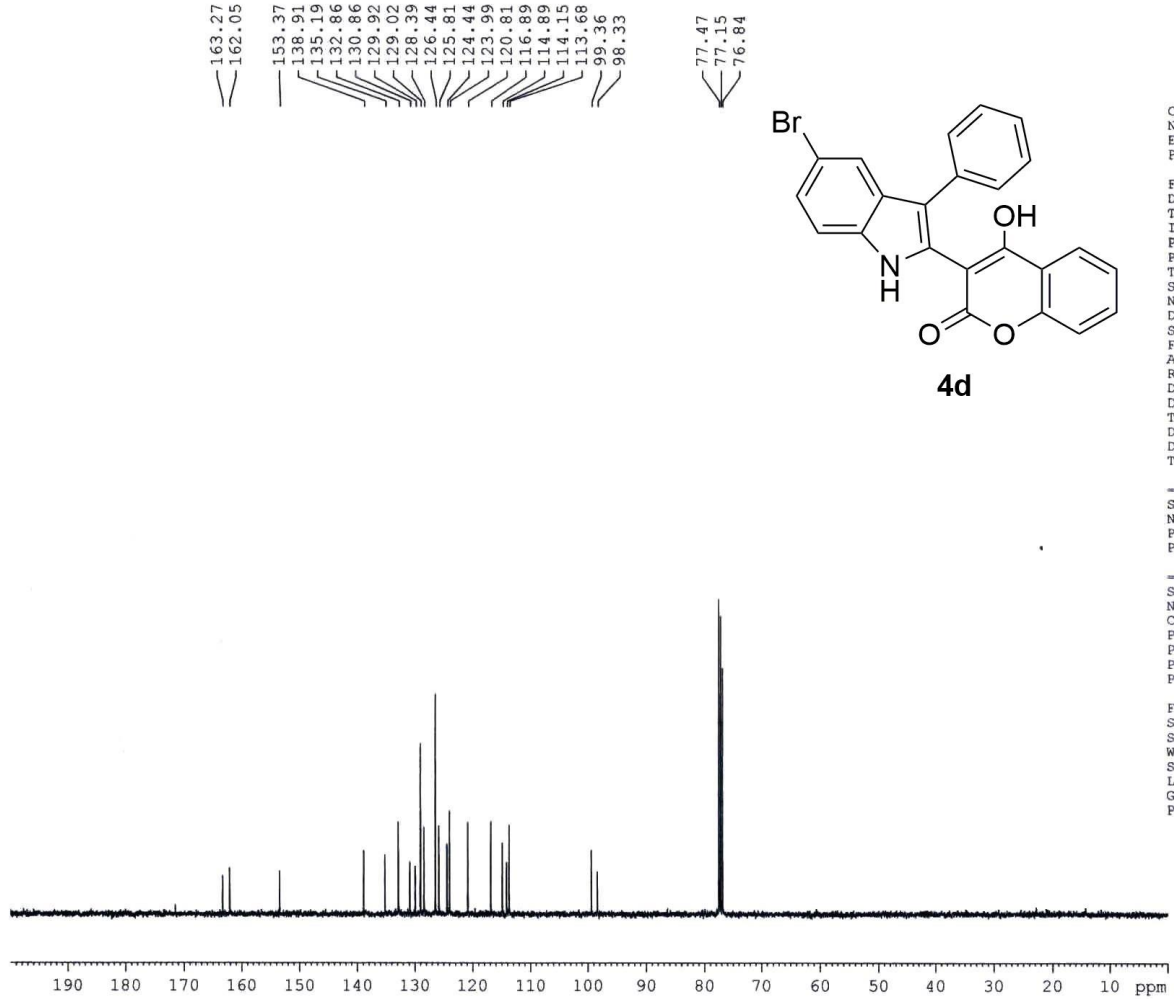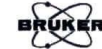

Current Data Parameters  
NAME Dr. A MAJEE 2020  
EXPNO 535  
PROCNO 1

F2 - Acquisition Parameters  
Date\_ 20201129  
Time\_ 15.50  
INSTRUM spect  
PROBHD 5 mm PABBO BB/  
PULPROG zgpg30  
TD 32768  
SOLVENT CDCl3  
NS 256  
DS 2  
SWH 24038.461 Hz  
FIDRES 0.733596 Hz  
AQ 0.6815744 sec  
RG 54.07  
DW 20.800 usec  
DE 6.50 usec  
TE 297.8 K  
D1 2.0000000 sec  
D11 0.0300000 sec  
TD0 1

----- CHANNEL f1 -----  
SFO1 100.6278588 MHz  
NUC1 13C  
P1 8.90 usec  
PLW1 54.0000000 W

----- CHANNEL f2 -----  
SFO2 400.1516006 MHz  
NUC2 1H  
CPDPRG2 waltz16  
PCPD2 90.00 usec  
PLW2 12.0000000 W  
PLW12 0.32231000 W  
PLW13 0.16212000 W

F2 - Processing parameters  
SI 16384  
SF 100.6177873 MHz  
WDW EM  
SSB 0  
LB 1.00 Hz  
GB 0  
PC 1.40

1H of VBSAS-200/4

9.118  
7.867  
7.864  
7.847  
7.844  
7.660  
7.657  
7.639  
7.621  
7.617  
7.453  
7.430  
7.425  
7.416  
7.406  
7.362  
7.342  
7.323  
7.290  
7.286  
7.239  
7.247  
7.241  
7.233  
7.230  
7.220  
7.188  
7.166  
7.087  
7.082  
7.065  
7.060

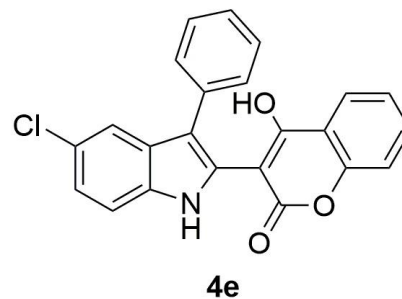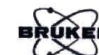

Current Data Parameters  
NAME Dr. A MAJEE 2020  
EXPNO 544  
PROCNO 1

F2 - Acquisition Parameters  
Date\_ 20201207  
Time\_ 19.52  
INSTRUM spect  
PROBHD 5 mm PABBO BB/  
PULPROG zg30  
TD 32768  
SOLVENT CDC13  
NS 8  
DS 1  
SWH 8223.685 Hz  
FIDRES 0.250967 Hz  
AQ 1.9922944 sec  
RG 186.42  
DW 60.800 usec  
DE 6.50 usec  
TE 295.6 K  
D1 1.00000000 sec  
TD0 1

===== CHANNEL f1 =====  
SFO1 400.1524711 MHz  
NUC1 1H  
P1 14.75 usec  
PLW1 12.00000000 W

F2 - Processing parameters  
SI 16384  
SF 400.1500092 MHz  
WDW EM  
SSB 0  
LB 0.30 Hz  
GB 0  
PC 2.00

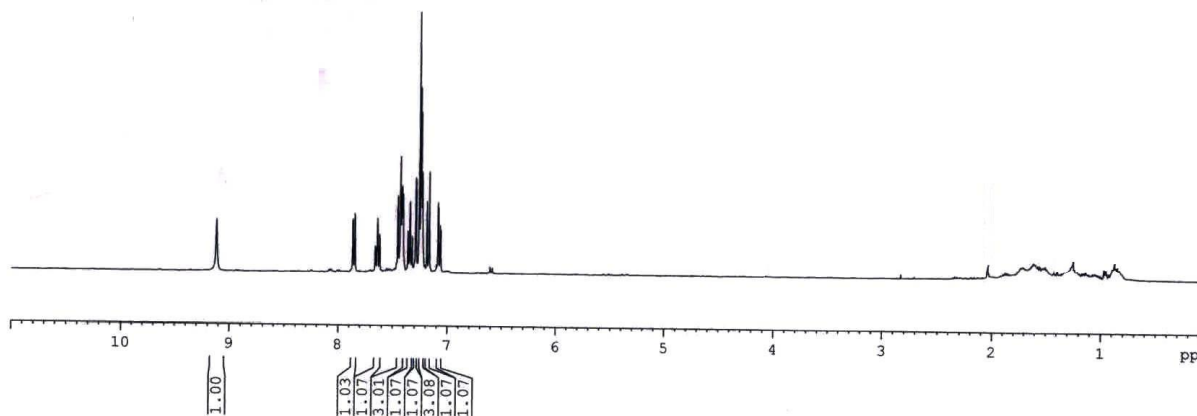

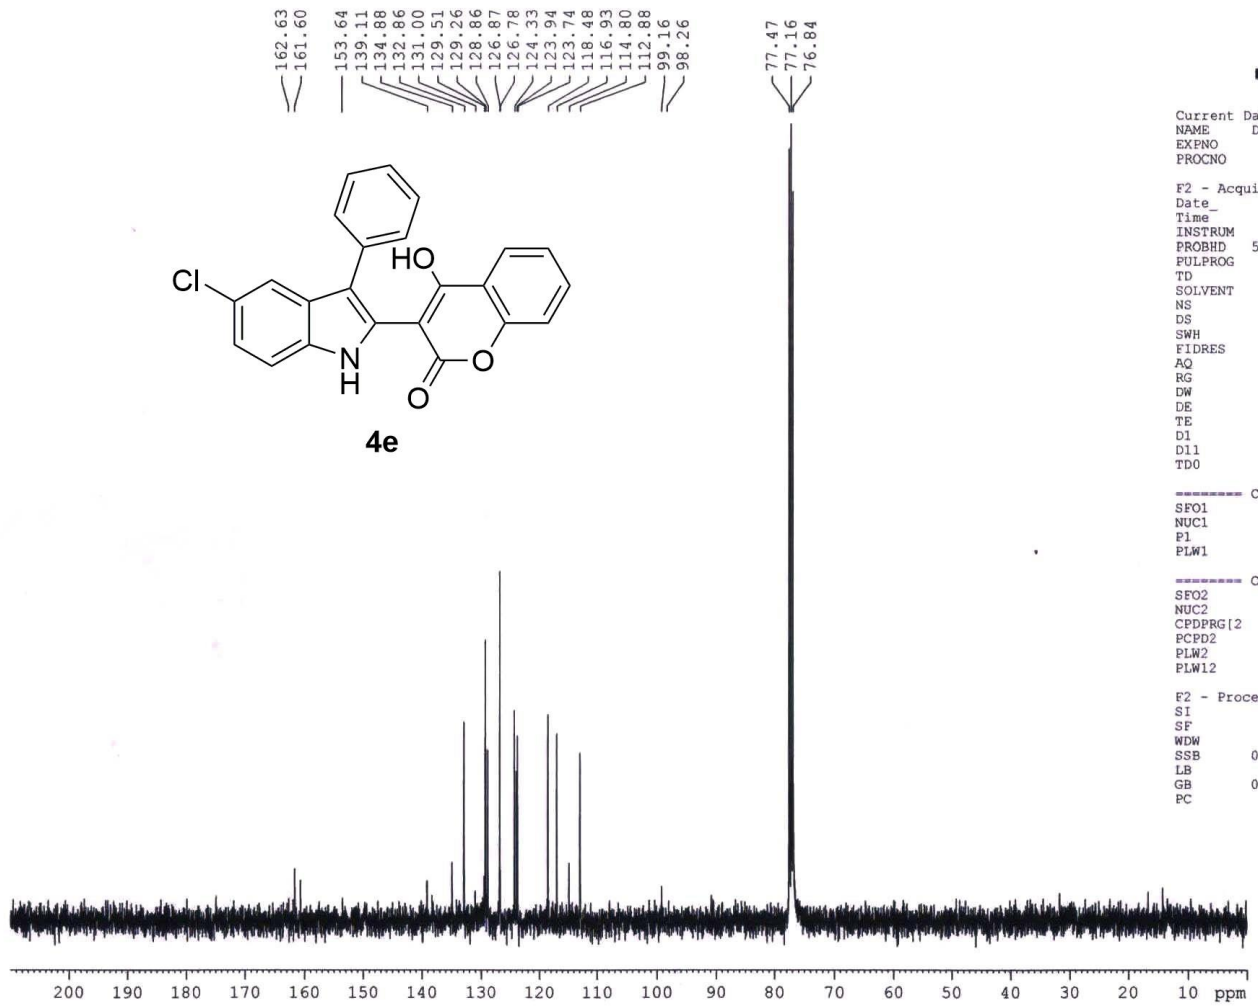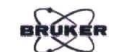

Current Data Parameters  
 NAME Dr. A MAJEE 2020  
 EXPNO 545  
 PROCNO 1

F2 - Acquisition Parameters  
 Date\_ 20201208  
 Time\_ 14.08  
 INSTRUM spect  
 PROBHD 5 mm PABBO BB/  
 PULPROG zgpg  
 TD 32768  
 SOLVENT CDCl3  
 NS 1024  
 DS 2  
 SWH 24038.461 Hz  
 FIDRES 0.733596 Hz  
 AQ 0.6815744 sec  
 RG 186.42  
 DW 20.800 usec  
 DE 6.50 usec  
 TE 296.1 K  
 D1 2.00000000 sec  
 D11 0.03000000 sec  
 TDO 1

----- CHANNEL f1 -----  
 SFO1 100.6278588 MHz  
 NUC1 13C  
 P1 8.90 usec  
 PLW1 54.00000000 W

----- CHANNEL f2 -----  
 SFO2 400.1516006 MHz  
 NUC2 1H  
 CPDPRG2 waltz16  
 PCPD2 90.00 usec  
 PLW2 12.00000000 W  
 PLW12 0.32231000 W

F2 - Processing parameters  
 SI 16384  
 SF 100.6177842 MHz  
 WDW EM  
 SSB 0  
 LB 1.00 Hz  
 GB 0  
 PC 1.00

1H of VBSAS-200

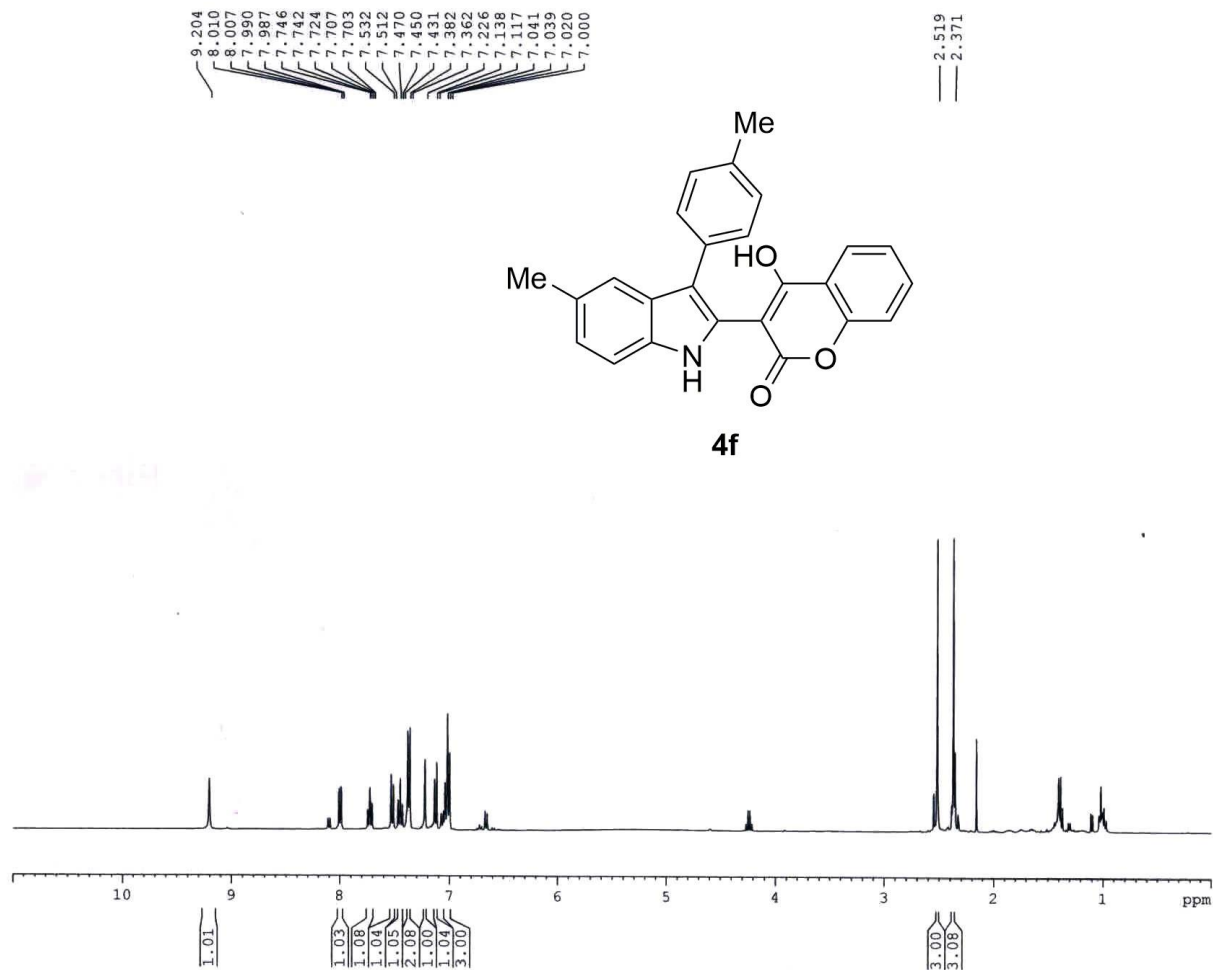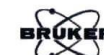

Current Data Parameters  
NAME Dr. A MAJEE 2020  
EXPNO 532  
PROCNO 1

F2 - Acquisition Parameters  
Date\_ 20201129  
Time 15.00  
INSTRUM spect  
PROBHD 5 mm PABBO BB/  
PULPROG zg30  
TD 32768  
SOLVENT CDC13  
NS 8  
DS 1  
SWH 8223.685 Hz  
FIDRES 0.250967 Hz  
AQ 1.9922944 sec  
RG 93.46  
DW 60.800 usec  
DE 6.50 usec  
TE 298.4 K  
D1 1.00000000 sec  
TD0 1

===== CHANNEL f1 =====  
SFO1 400.1524711 MHz  
NUC1 1H  
P1 14.75 usec  
PLW1 12.00000000 W

F2 - Processing parameters  
SI 16384  
SF 400.1499610 MHz  
WDW EM  
SSB 0  
LB 0.30 Hz  
GB 0  
PC 2.00

13C of VBSAS-200

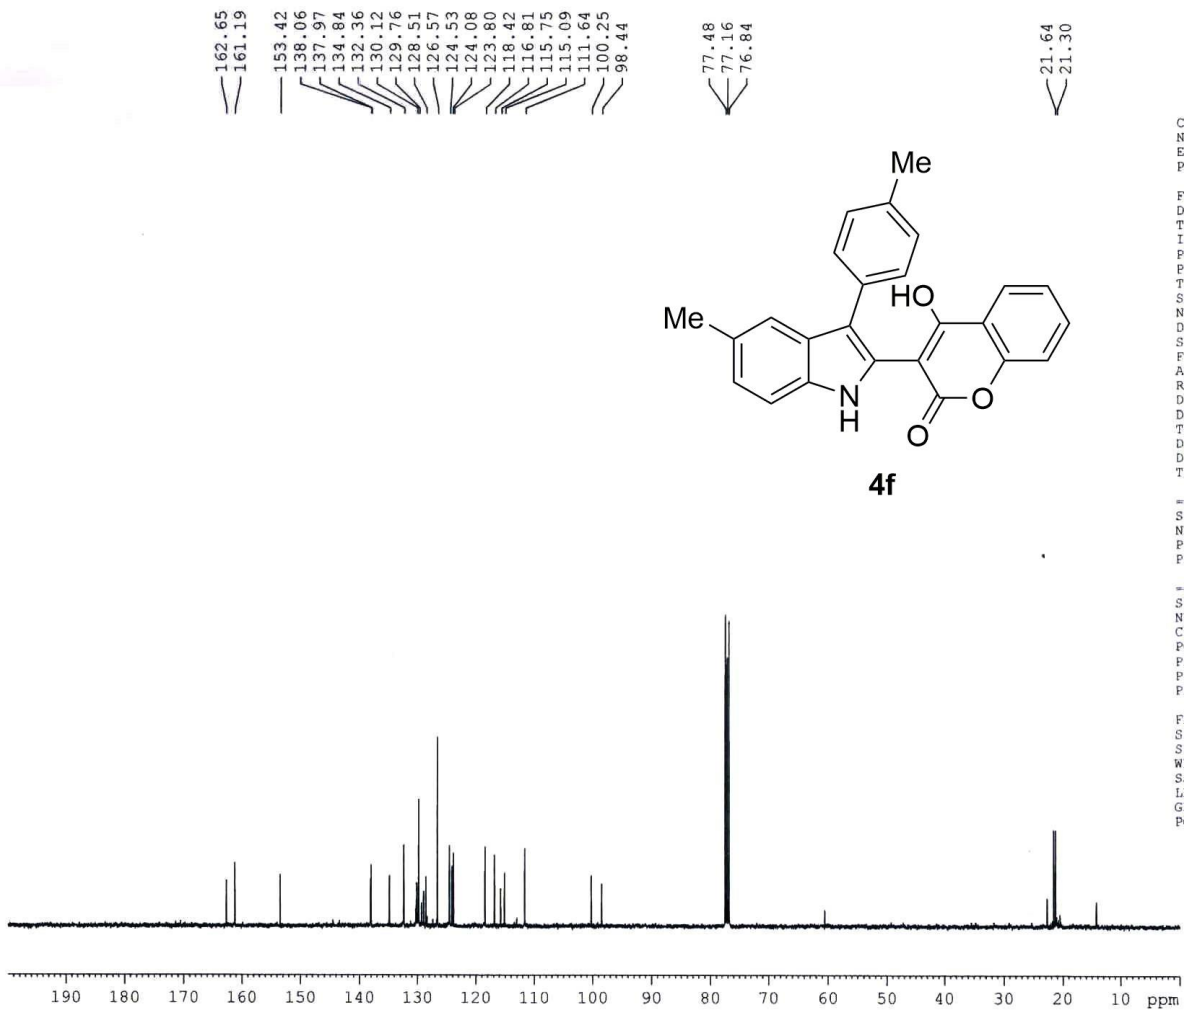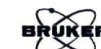

Current Data Parameters  
NAME Dr. A MAJEE 2020  
EXPNO 533  
PROCNO 1

F2 - Acquisition Parameters  
Date\_ 20201129  
Time 15.25  
INSTRUM spect  
PROBHD 5 mm PABBO BB/  
PULPROG zgpg30  
TD 32768  
SOLVENT CDCl3  
NS 512  
DS 2  
SWH 24038.461 Hz  
FIDRES 0.733596 Hz  
AQ 0.6815744 sec  
RG 93.46  
DW 20.800 usec  
DE 6.50 usec  
TE 298.3 K  
D1 2.00000000 sec  
D11 0.03000000 sec  
TDO 1

===== CHANNEL f1 =====  
SFO1 100.6278588 MHz  
NUC1 13C  
P1 8.90 usec  
PLW1 54.00000000 W

===== CHANNEL f2 =====  
SFO2 400.1516006 MHz  
NUC2 1H  
CFDPRG12 waltz16  
PCPD2 90.00 usec  
PLW2 12.00000000 W  
PLW12 0.32231000 W  
PLW13 0.16212000 W

F2 - Processing parameters  
SI 16384  
SF 100.6177873 MHz  
WDW EM  
SSB 0  
LB 1.00 Hz  
GB 0  
PC 1.40



1H of VBSAS-200/12

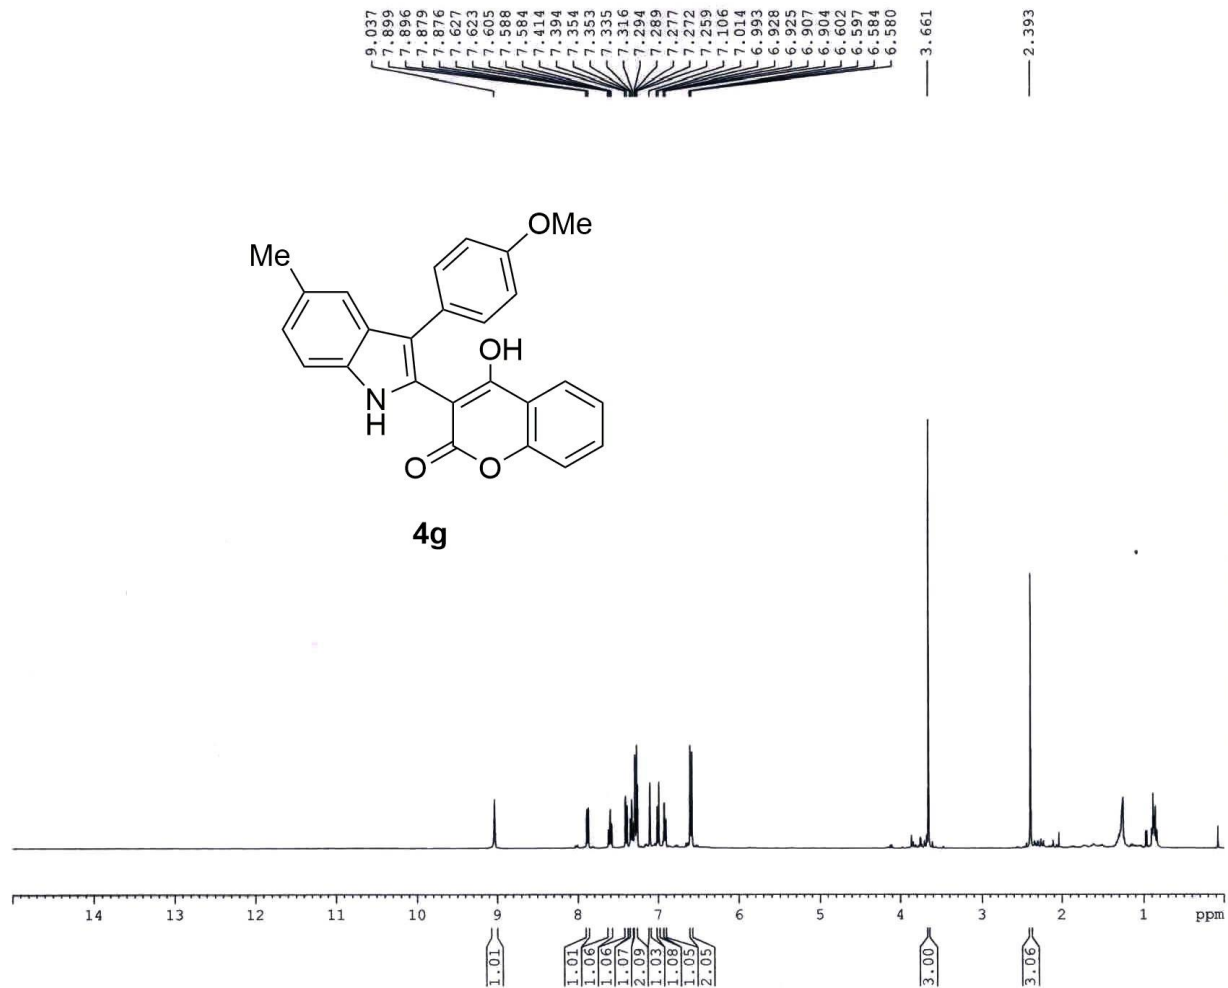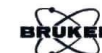

Current Data Parameters  
NAME Dr. A MAJEE 2020  
EXPNO 603  
PROCNO 1

F2 - Acquisition Parameters  
Date\_ 20201230  
Time 4.12  
INSTRUM spect  
PROBHD 5 mm PABBO BB/  
PULPROG zg30  
TD 32768  
SOLVENT CDCl3  
NS 8  
DS 1  
SWH 8223.685 Hz  
FIDRES 0.250967 Hz  
AQ 1.9922944 sec  
RG 120.16  
DW 60.800 usec  
DE 6.50 usec  
TE 295.9 K  
D1 1.00000000 sec  
TD0 1

==== CHANNEL f1 =====  
SFO1 400.1524711 MHz  
NUC1 1H  
P1 14.75 usec  
PLW1 12.00000000 W

F2 - Processing parameters  
SI 16384  
SF 400.1500092 MHz  
WDW EM  
SSB 0  
LB 0.30 Hz  
GB 0  
PC 2.00

<sup>13</sup>C of VBSAS-200/1:

162.62  
161.13  
159.53  
153.42  
137.92  
134.78  
132.39  
130.15  
128.51  
128.08  
124.43  
124.32  
124.12  
123.81  
118.38  
116.83  
115.07  
114.51  
111.58  
100.25  
97.93

77.47  
77.15  
76.83

55.21

21.67

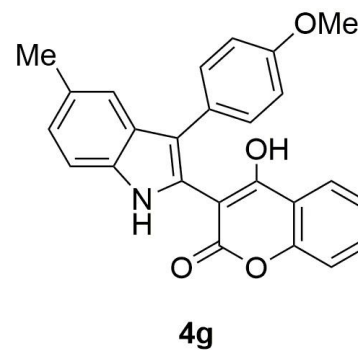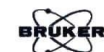

Current Data Parameters  
NAME Dr. A MAJEE 2020  
EXPNO 604  
PROCNO 1

F2 - Acquisition Parameters  
Date\_ 20201230  
Time 5.00  
INSTRUM spect  
PROBHD 5 mm PABBO BB/  
PULPROG zgdc  
TD 32768  
SOLVENT CDCl3  
NS 1024  
DS 2  
SWH 24038.461 Hz  
FIDRES 0.733596 Hz  
AQ 0.6815744 sec  
RG 120.16  
DW 20.800 usec  
DE 6.50 usec  
TE 297.1 K  
D1 2.00000000 sec  
D11 0.03000000 sec  
TD0 1

----- CHANNEL f1 -----  
SFO1 100.6278588 MHz  
NUC1 13C  
P1 8.90 usec  
PLW1 54.00000000 W

----- CHANNEL f2 -----  
SFO2 400.1516006 MHz  
NUC2 1H  
CPDPRG[2] waltz16  
PCPD2 90.00 usec  
PLW2 12.00000000 W  
PLW12 0.32231000 W

F2 - Processing parameters  
SI 16384  
SF 100.6177858 MHz  
WDW EM  
SSB 0  
LB 1.00 Hz  
GB 0  
PC 1.00

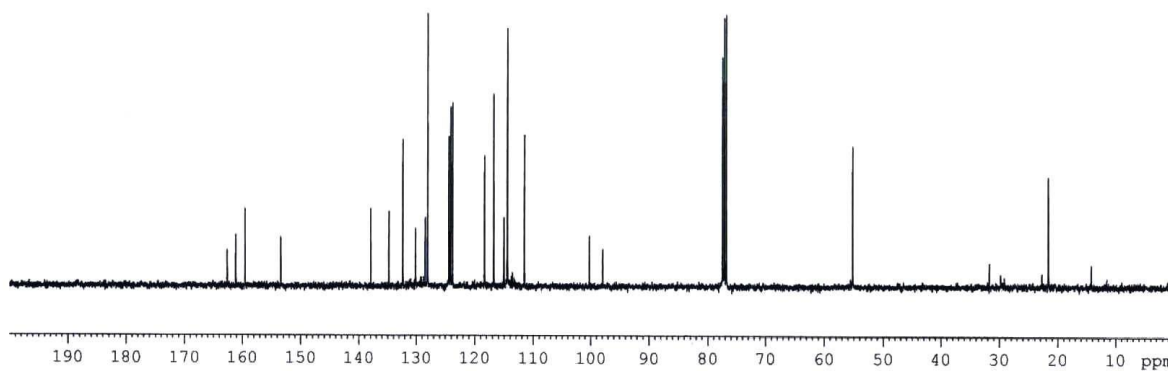

1H of VBSAS-200/13

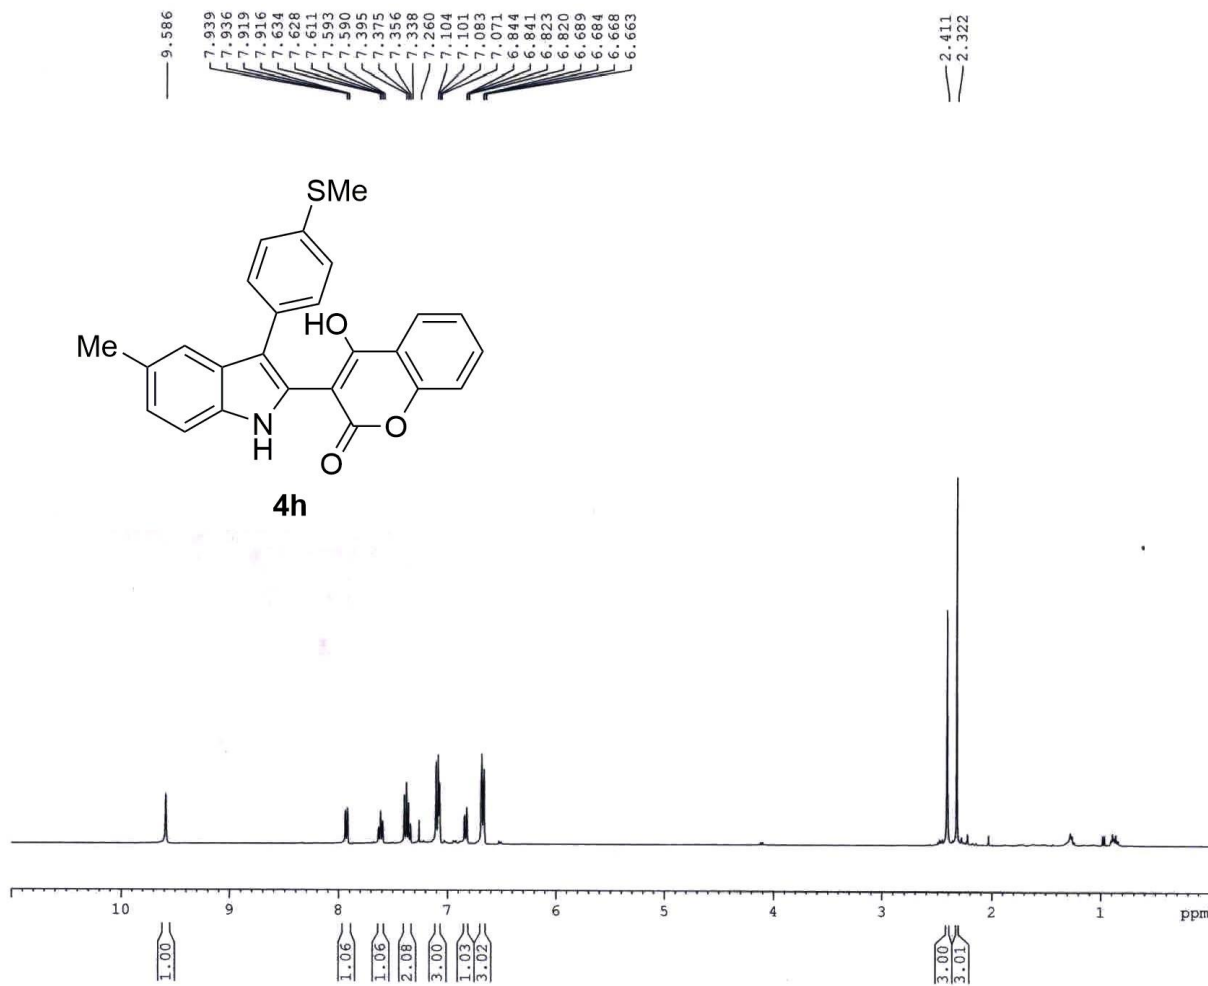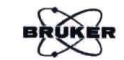

Current Data Parameters  
 NAME Dr. A MAJEE 2021  
 EXPNO 17  
 PROCNO 1

F2 - Acquisition Parameters  
 Date\_ 20210106  
 Time 5.48  
 INSTRUM spect  
 PROBHD 5 mm PABBO BB/  
 PULPROG zg30  
 TD 32768  
 SOLVENT CDCl3  
 NS 8  
 DS 1  
 SWH 8223.685 Hz  
 FIDRES 0.250967 Hz  
 AQ 1.9922944 sec  
 RG 77.59  
 DW 60.800 usec  
 DE 6.50 usec  
 TE 297.6 K  
 D1 1.00000000 sec  
 TDO 1

----- CHANNEL f1 -----  
 SF01 400.1524711 MHz  
 NUC1 1H  
 P1 14.75 usec  
 PLW1 12.00000000 W

F2 - Processing parameters  
 SI 16384  
 SF 400.1500087 MHz  
 WDW EM  
 SSB 0  
 LB 0.30 Hz  
 GB 0  
 PC 2.00

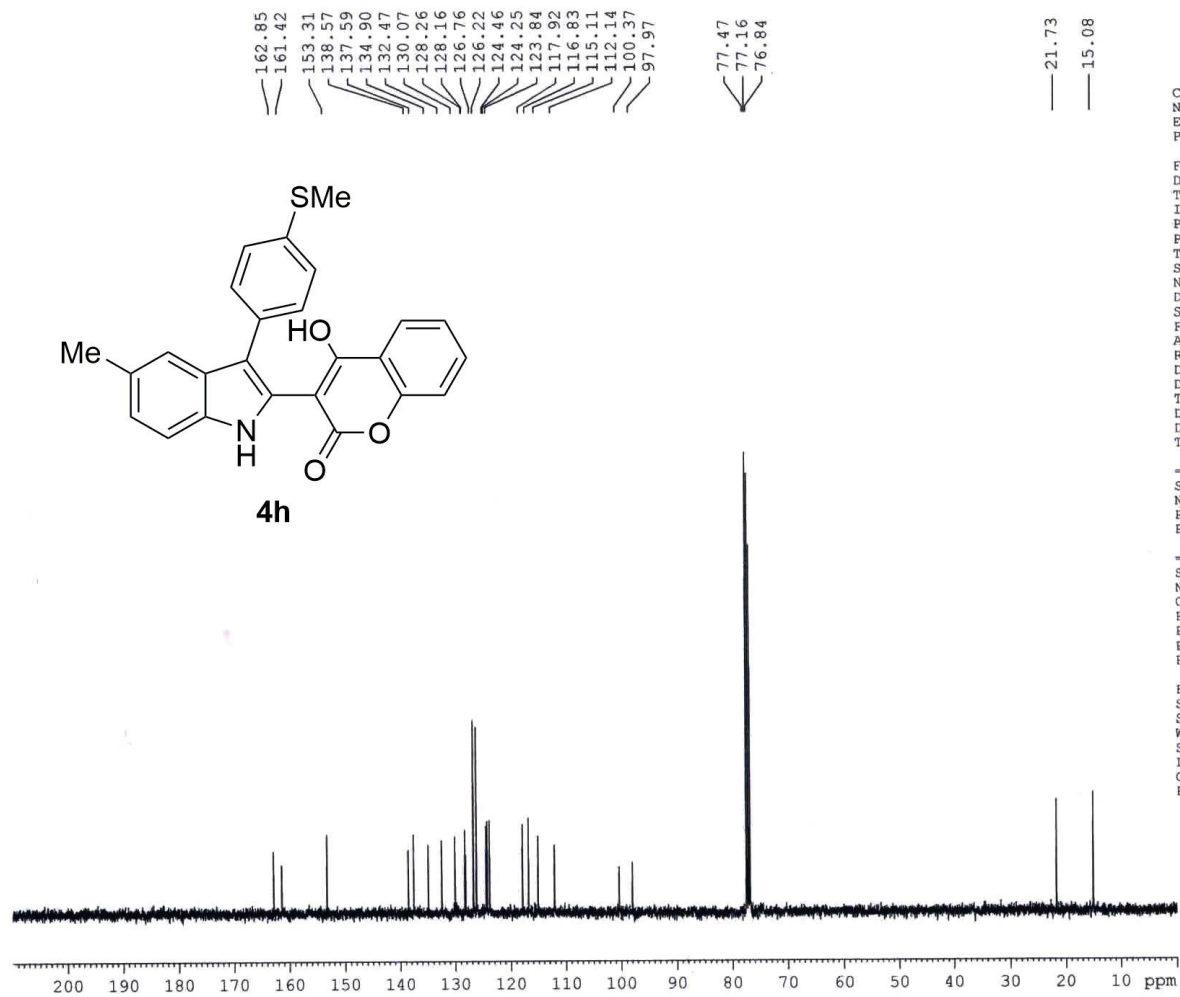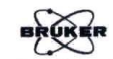

Current Data Parameters  
 NAME Dr. A MAJEE 2021  
 EXPNO 18  
 PROCNO 1

F2 - Acquisition Parameters  
 Date 20210106  
 Time 5.57  
 INSTRUM spect  
 PROBHD 5 mm PABBO BB/  
 PULPROG zgpg30  
 TD 32768  
 SOLVENT CDCl3  
 NS 160  
 DS 2  
 SWH 24038.461 Hz  
 FIDRES 0.733596 Hz  
 AQ 0.6815744 sec  
 RG 77.59  
 DW 20.800 usec  
 DE 6.50 usec  
 TE 298.1 K  
 D1 2.0000000 sec  
 D11 0.0300000 sec  
 TDO 1

===== CHANNEL f1 =====  
 SFO1 100.6278588 MHz  
 NUC1 13C  
 P1 8.90 usec  
 PLW1 54.0000000 W

===== CHANNEL f2 =====  
 SFO2 400.1516006 MHz  
 NUC2 1H  
 CPDPRG12 waltz16  
 PCPD2 90.00 usec  
 PLW2 12.0000000 W  
 PLW12 0.32231000 W  
 PLW13 0.16212000 W

F2 - Processing parameters  
 SI 16384  
 SF 100.6177872 MHz  
 WDW EM  
 SSB 0  
 LB 1.00 Hz  
 GB 0  
 PC 1.40

1H of VBSAS-200/6

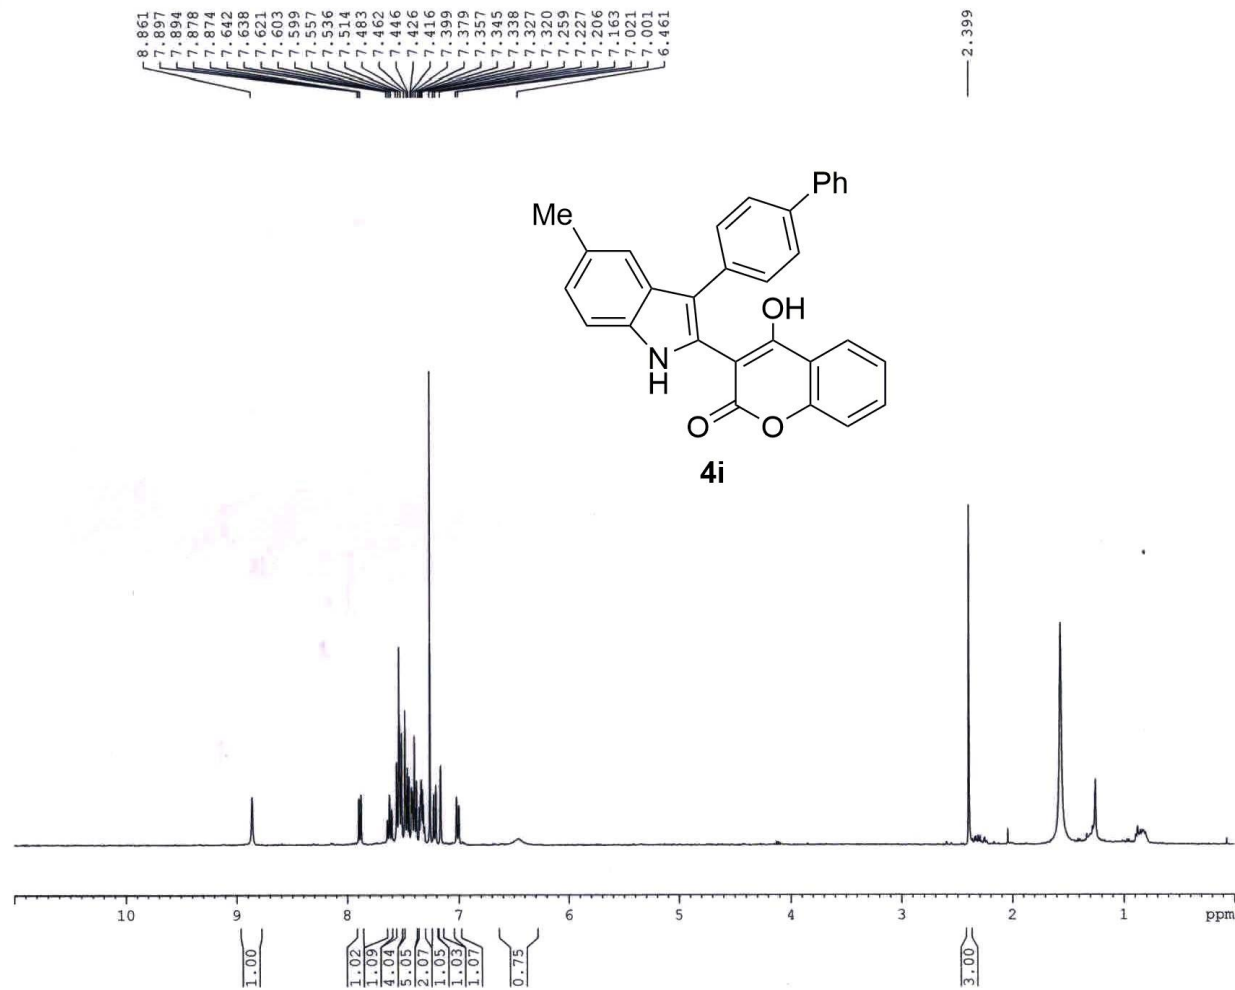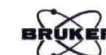

Current Data Parameters  
NAME Dr. A MAJEE 2020  
EXPNO 558  
PROCNO 1

F2 - Acquisition Parameters  
Date\_ 20201214  
Time\_ 16.30  
INSTRUM spect  
PROBHD 5 mm PABBO BB/  
PULPROG zg30  
TD 32768  
SOLVENT CDCl3  
NS 8  
DS 1  
SWH 8223.685 Hz  
FIDRES 0.250967 Hz  
AQ 1.9922944 sec  
RG 186.42  
DW 60.800 usec  
DE 6.50 usec  
TE 295.5 K  
D1 1.00000000 sec  
TD0 1

----- CHANNEL f1 -----  
SFO1 400.1524711 MHz  
NUC1 1H  
P1 14.75 usec  
PLW1 12.00000000 W

F2 - Processing parameters  
SI 16384  
SF 400.1500092 MHz  
WDW EM  
SSB 0  
LB 0.30 Hz  
GB 0  
PC 2.00

13C of VBSAS-200/6

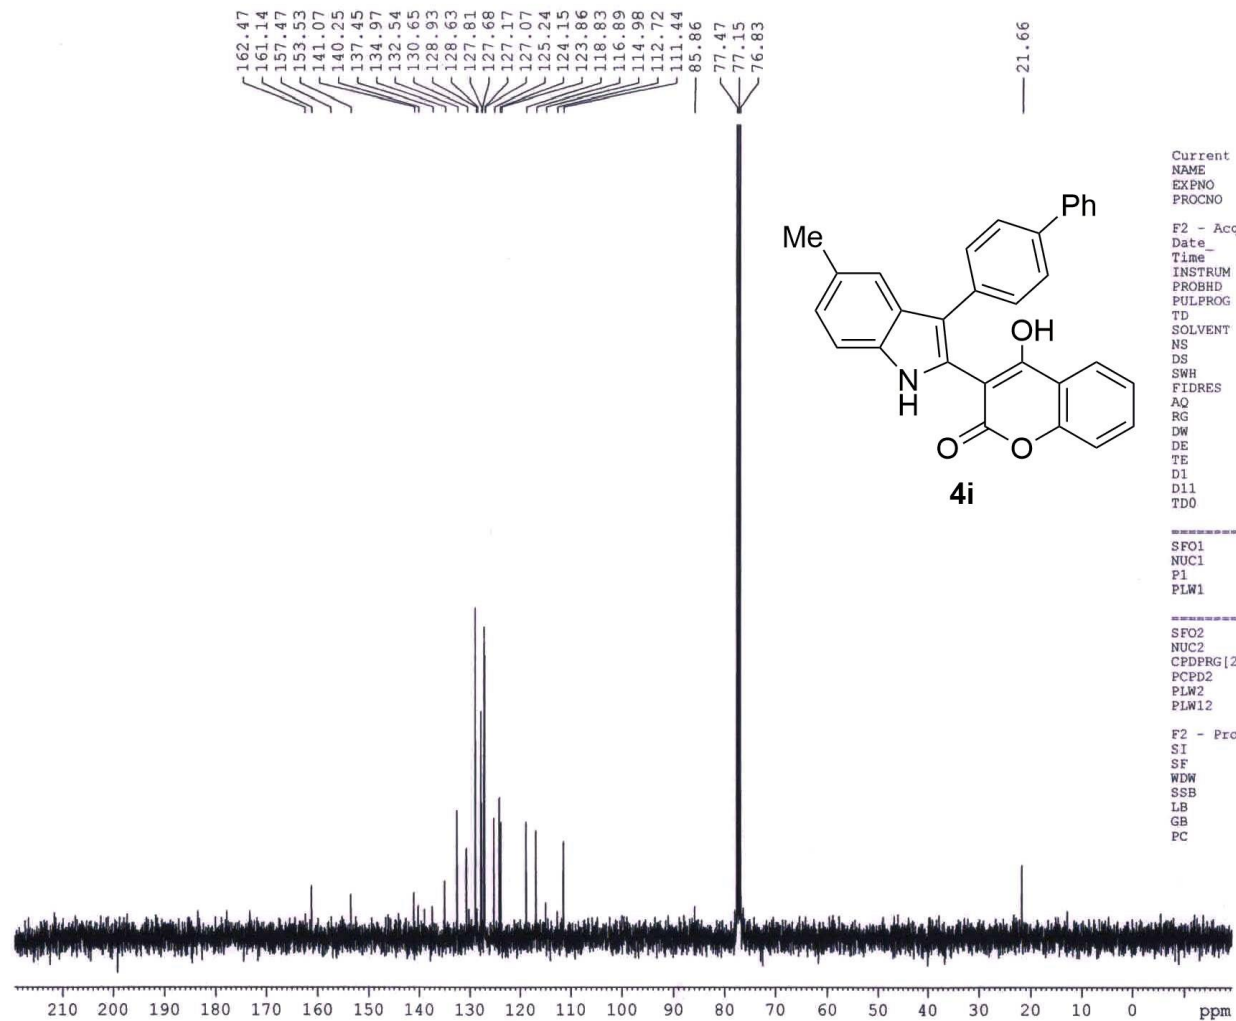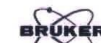

Current Data Parameters  
NAME Dr. A MAJEE 2020  
EXPNO 559  
PROCNO 1

F2 - Acquisition Parameters  
Date\_ 20201214  
Time 17.21  
INSTRUM spect  
PROBHD 5 mm FAPBO BB/  
PULPROG zgdc  
TD 32768  
SOLVENT CDC13  
NS 1024  
DS 2  
SWH 24038.461 Hz  
FIDRES 0.733596 Hz  
AQ 0.6815744 sec  
RG 186.42  
DW 20.800 usec  
DE 6.50 usec  
TE 296.5 K  
D1 2.0000000 sec  
D11 0.0300000 sec  
TDO 1

----- CHANNEL f1 -----  
SFO1 100.6278588 MHz  
NUC1 13C  
P1 8.90 usec  
PLW1 54.0000000 W

----- CHANNEL f2 -----  
SFO2 400.1516006 MHz  
NUC2 1H  
CPDPRG[2] waltz16  
PCPD2 90.00 usec  
PLW2 12.0000000 W  
PLW12 0.32231000 W

F2 - Processing parameters  
SI 16384  
SF 100.6177844 MHz  
WDW EM  
SSB 0  
LB 1.00 Hz  
GB 0  
PC 1.00

1H of VBSAS-200/10

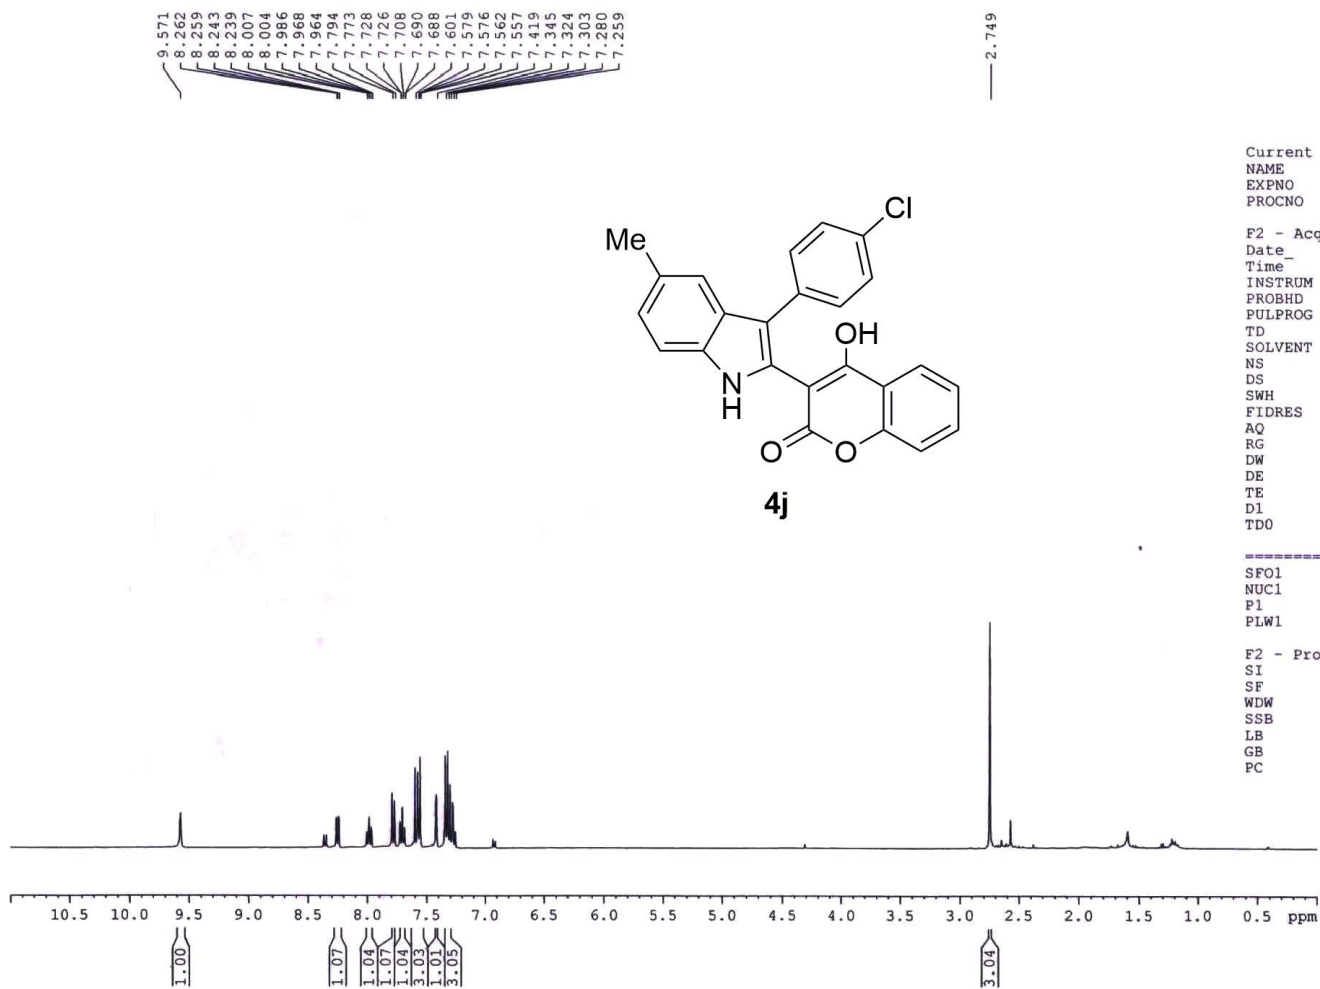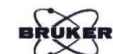

Current Data Parameters  
NAME Dr. A MAJEE 2020  
EXPNO 580  
PROCNO 1

F2 - Acquisition Parameters  
Date\_ 20201223  
Time 15.12  
INSTRUM spect  
PROBHD 5 mm PABBO BB/  
PULPROG zg30  
TD 32768  
SOLVENT CDCl3  
NS 8  
DS 1  
SWH 8223.685 Hz  
FIDRES 0.250967 Hz  
AQ 1.9922944 sec  
RG 186.42  
DW 60.800 usec  
DE 6.50 usec  
TE 295.4 K  
D1 1.00000000 sec  
TD0 1

----- CHANNEL f1 -----  
SF01 400.1524711 MHz  
NUC1 1H  
P1 14.75 usec  
PLW1 12.00000000 W

F2 - Processing parameters  
SI 16384  
SF 400.1498725 MHz  
WDW EM  
SSB 0  
LB 0.30 Hz  
GB 0  
PC 2.00

13C of VBSAS-200/10

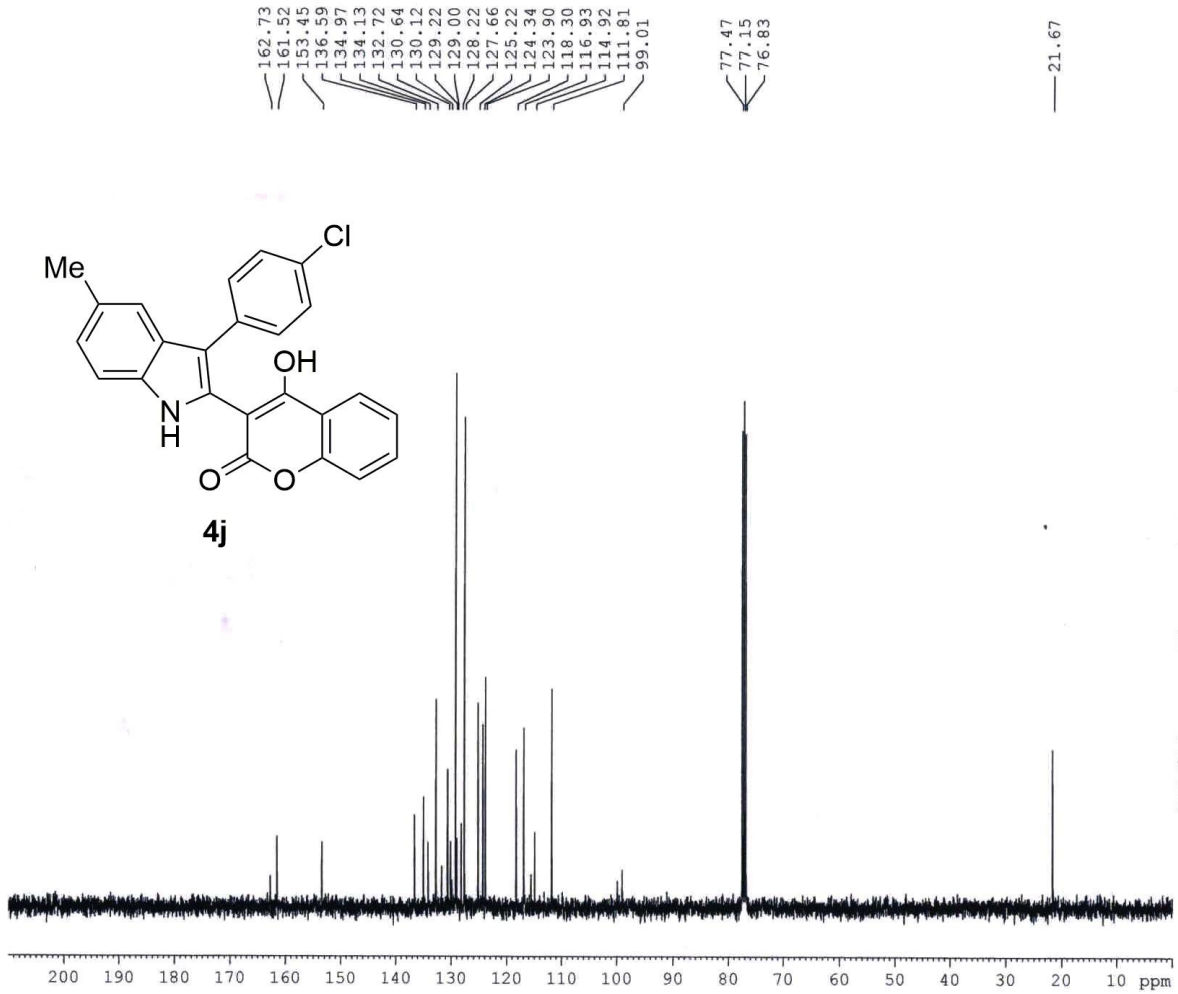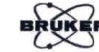

Current Data Parameters  
NAME Dr. A MAJEE 2020  
EXPNO 581  
PROCNO 1

F2 - Acquisition Parameters  
Date\_ 20201223  
Time 15.44  
INSTRUM spect  
PROBHD 5 mm PABBO BB/  
PULPROG zgdc  
TD 32768  
SOLVENT CDCl3  
NS 640  
DS 2  
SWH 24038.461 Hz  
FIDRES 0.733596 Hz  
AQ 0.6815744 sec  
RG 186.42  
DW 20.800 usec  
DE 6.50 usec  
TE 296.3 K  
D1 2.0000000 sec  
D11 0.0300000 sec  
TD0 1

----- CHANNEL f1 -----  
SFO1 100.6278588 MHz  
NUC1 13C  
P1 8.90 usec  
PLW1 54.0000000 W

----- CHANNEL f2 -----  
SFO2 400.1516006 MHz  
NUC2 1H  
CPDPRG[2] waltz16  
PCPD2 90.00 usec  
PLW2 12.0000000 W  
PLW12 0.32231000 W

F2 - Processing parameters  
SI 16384  
SF 100.6177843 MHz  
WDW EM  
SSB 0  
LB 1.00 Hz  
GB 0  
PC 1.00



1H of VBSAS-200/2

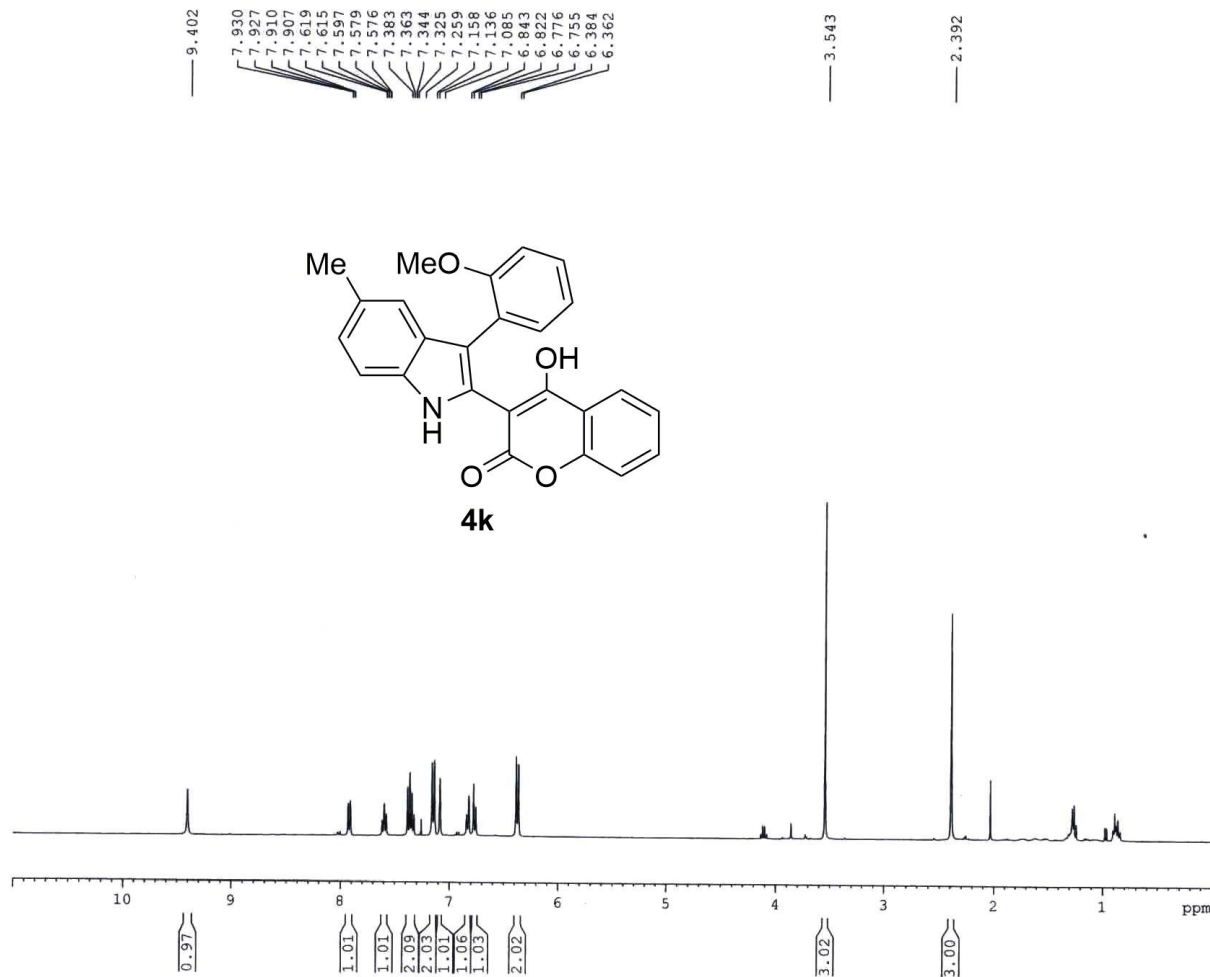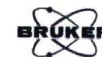

Current Data Parameters  
 NAME Dr. A MAJEE 2020  
 EXPNO 546  
 PROCNO 1

F2 - Acquisition Parameters  
 Date\_ 20201207  
 Time\_ 20.28  
 INSTRUM spect  
 PROBHD 5 mm PABBO BB/  
 PULPROG zg30  
 TD 32768  
 SOLVENT CDCl3  
 NS 8  
 DS 1  
 SWH 8223.685 Hz  
 FIDRES 0.250967 Hz  
 AQ 1.9922944 sec  
 RG 77.59  
 DW 60.800 usec  
 DE 6.50 usec  
 TE 295.6 K  
 D1 1.00000000 sec  
 TDO 1

===== CHANNEL f1 =====  
 SF01 400.1524711 MHz  
 NUC1 1H  
 P1 14.75 usec  
 PLW1 12.00000000 W

F2 - Processing parameters  
 SI 16384  
 SF 400.1500091 MHz  
 WDW EM  
 SSB 0  
 LB 0.30 Hz  
 GB 0  
 PC 2.00

13C of VBSAS-200/2

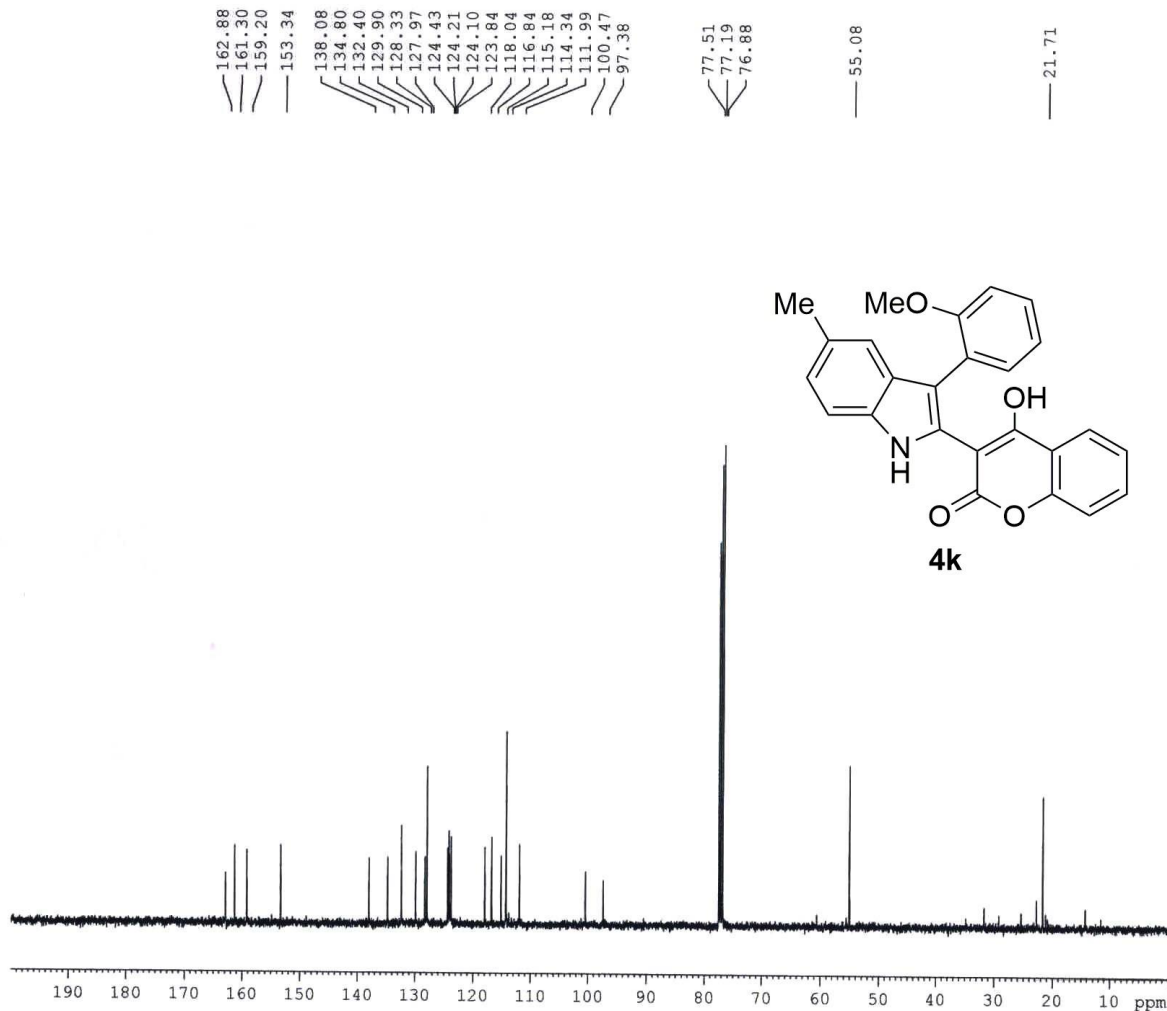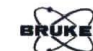

Current Data Parameters  
NAME Dr. A MAJEE 2020  
EXPNO 547  
PROCNO 1

F2 - Acquisition Parameters  
Date\_ 20201207  
Time 20.45  
INSTRUM spect  
PROBHD 5 mm PABBO BB/  
PULPROG zgpg30  
TD 32768  
SOLVENT CDCl3  
NS 256  
DS 2  
SWH 24038.461 Hz  
FIDRES 0.733596 Hz  
AQ 0.6815744 sec  
RG 77.59  
DW 20.800 usec  
DE 6.50 usec  
TE 296.2 K  
D1 2.0000000 sec  
D11 0.0300000 sec  
TD0 1

----- CHANNEL f1 -----  
SFO1 100.6278588 MHz  
NUC1 13C  
P1 8.90 usec  
PLW1 54.00000000 W

----- CHANNEL f2 -----  
SFO2 400.1516006 MHz  
NUC2 1H  
CPDPRG2 waltz16  
PCPD2 90.00 usec  
PLW2 12.00000000 W  
PLW12 0.32231000 W  
PLW13 0.16212000 W

F2 - Processing parameters  
SI 16384  
SF 100.6177887 MHz  
WDW EM  
SSB 0  
LB 1.00 Hz  
GB 0  
PC 1.40

1H of VBSAS-200/7

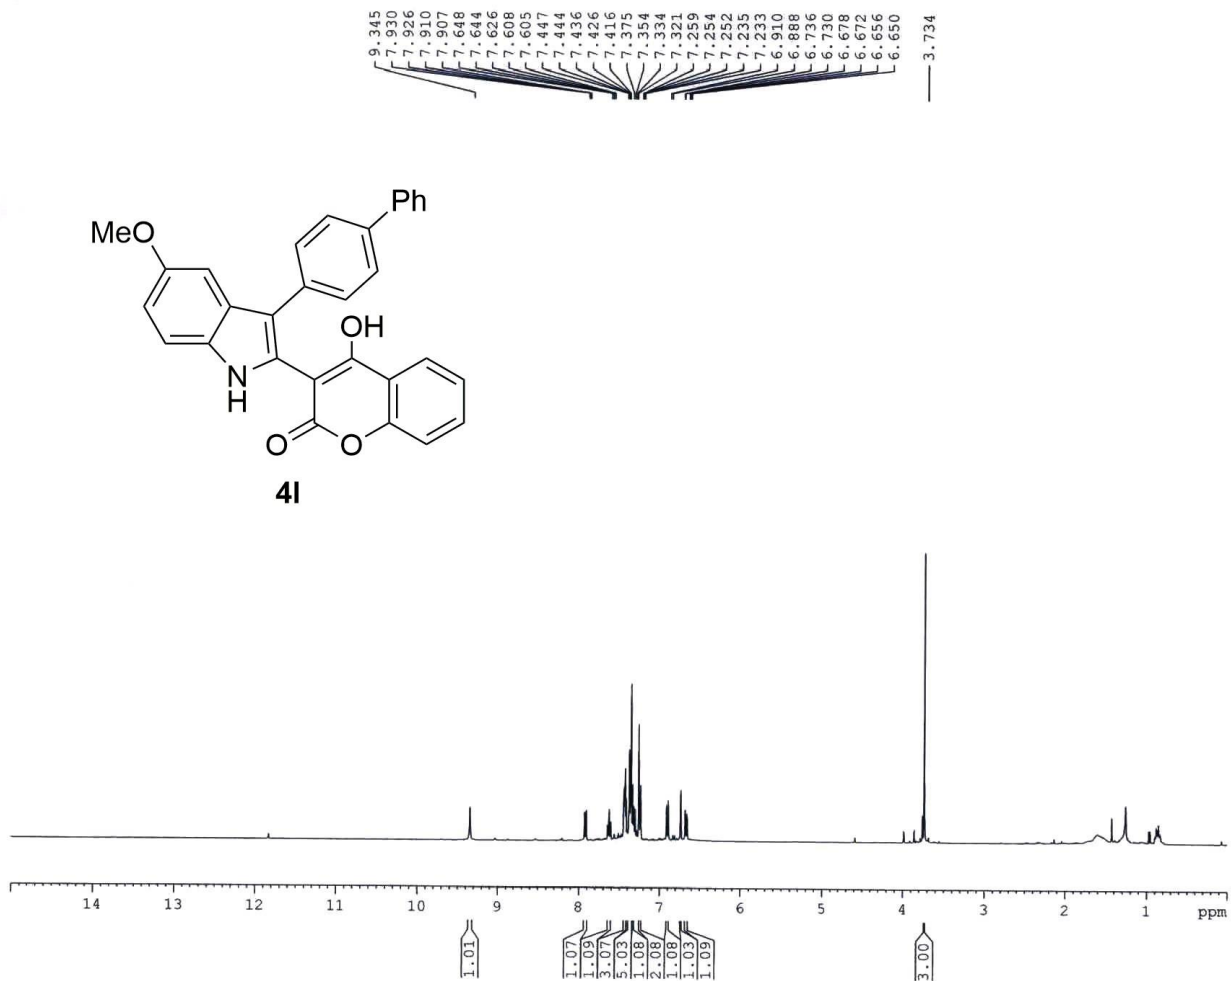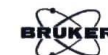

Current Data Parameters  
NAME Dr. A MAJEE 2020  
EXPNO 601  
PROCNO 1

F2 - Acquisition Parameters  
Date\_ 20201230  
Time 3.28  
INSTRUM spect  
PROBHD 5 mm PABBO BB/  
PULPROG zg30  
TD 32768  
SOLVENT CDC13  
NS 8  
DS 1  
SWH 8223.685 Hz  
FIDRES 0.250967 Hz  
AQ 1.9922944 sec  
RG 168.31  
DW 60.800 usec  
DE 6.50 usec  
TE 295.9 K  
D1 1.0000000 sec  
TD0 1

===== CHANNEL f1 =====  
SF01 400.1524711 MHz  
NUC1 1H  
P1 14.75 usec  
PLW1 12.00000000 W

F2 - Processing parameters  
SI 16384  
SF 400.1500092 MHz  
WDW EM  
SSB 0  
LB 0.30 Hz  
GB 0  
PC 2.00

13C of VBSAS-200/7

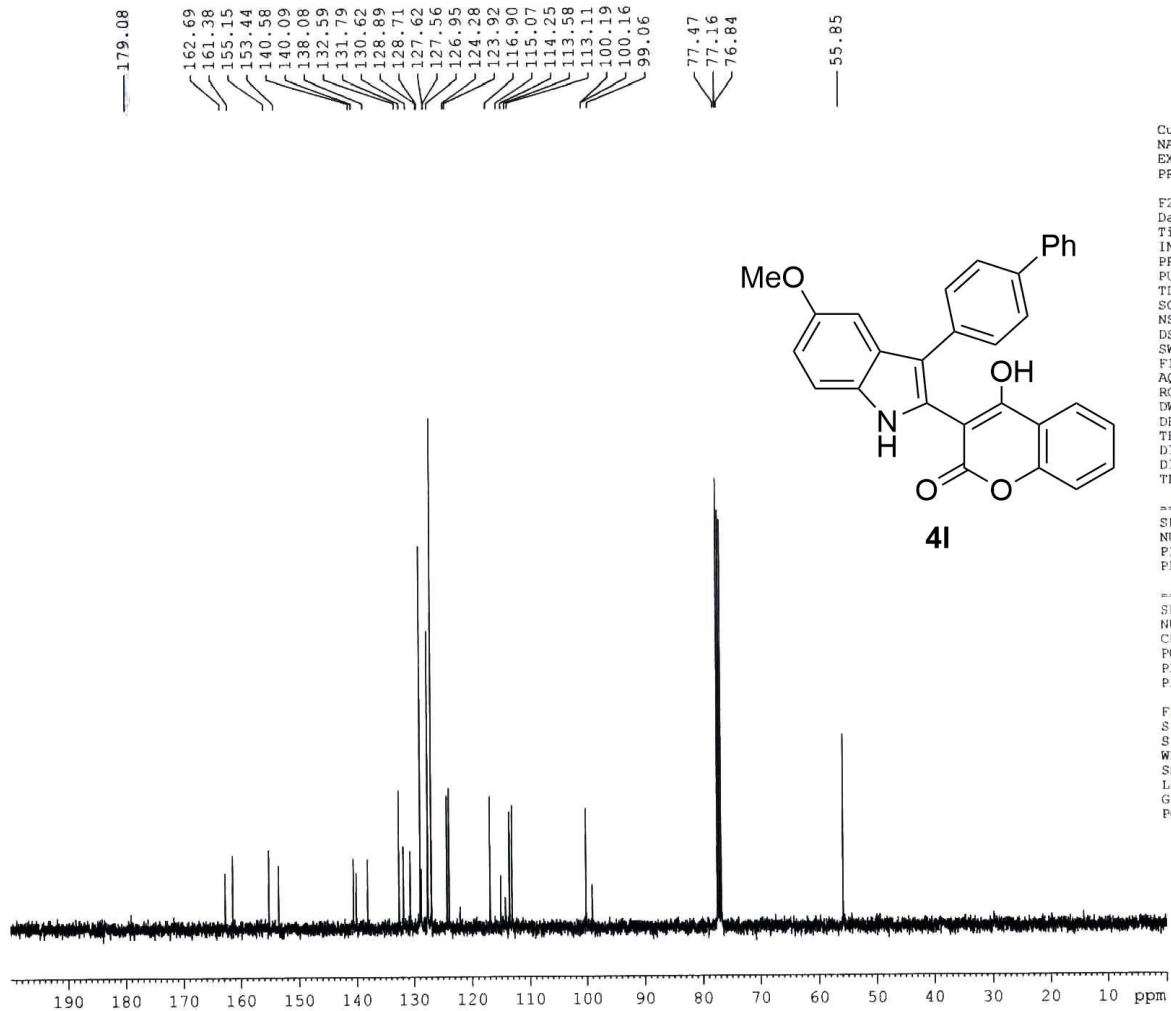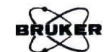

Current Data Parameters  
 NAME Dr. A MAJEE 2020  
 EXPNO 602  
 PROCNO 1

F2 - Acquisition Parameters  
 Date\_ 20201230  
 Time\_ 4.00  
 INSTRUM spect  
 PROBHD 5 mm PABBO BB/  
 PULPROG zgdc  
 TD 32768  
 SOLVENT CDCl3  
 NS 640  
 DS 2  
 SWH 24038.461 Hz  
 FIDRES 0.733596 Hz  
 AQ 0.6815744 sec  
 RG 168.31  
 DW 20.800 usec  
 DE 6.50 usec  
 TE 296.8 K  
 D1 2.0000000 sec  
 D11 0.0300000 sec  
 TD0 1

===== CHANNEL f1 =====  
 SFO1 100.6278588 MHz  
 NUC1 13C  
 P1 8.90 usec  
 PLW1 54.0000000 W

===== CHANNEL f2 =====  
 SFO2 400.1516006 MHz  
 NUC2 1H  
 CPDPRG12 waltz16  
 PCPD2 90.00 usec  
 PLW2 12.0000000 W  
 PLW12 0.32231000 W

F2 - Processing parameters  
 SI 16384  
 SF 100.6177844 MHz  
 WDW EM  
 SSB 0  
 LB 1.00 Hz  
 GB 0  
 EC 1.00

<sup>1</sup>H of VBSAS-200/15-PD

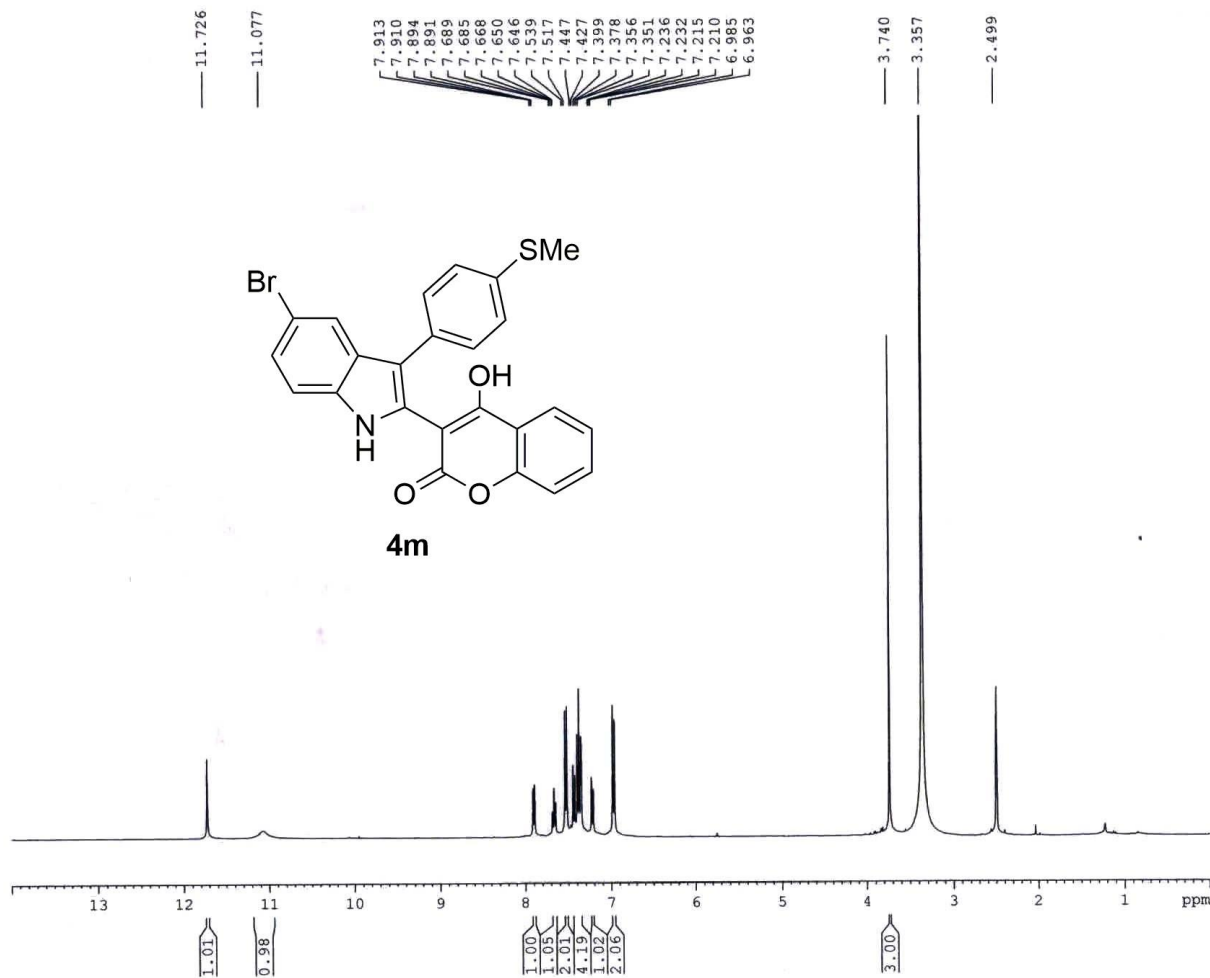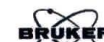

Current Data Parameters  
 NAME Dr. A MAJEE 2021  
 EXPNO 31  
 PROCNO 1

F2 - Acquisition Parameters  
 Date\_ 20210113  
 Time 14.22  
 INSTRUM spect  
 PROBHD 5 mm PABBO BB/  
 PULPROG zg30  
 TD 32768  
 SOLVENT DMSO  
 NS 8  
 DS 1  
 SWH 8223.685 Hz  
 FIDRES 0.250967 Hz  
 AQ 1.9922944 sec  
 RG 87.66  
 DW 60.800 usec  
 DE 6.50 usec  
 TE 296.1 K  
 D1 1.00000000 sec  
 TD0 1

----- CHANNEL f1 -----  
 SF01 400.1524711 MHz  
 NUC1 1H  
 P1 14.75 usec  
 PLW1 12.00000000 W

F2 - Processing parameters  
 SI 16384  
 SF 400.1500021 MHz  
 WDW EM  
 SSB 0  
 LB 0.30 Hz  
 GB 0  
 PC 2.00

13C of VBSAS-200/15PD

162.26  
161.85  
159.01  
152.76  
138.37  
134.92  
132.21  
131.22  
128.11  
124.75  
124.19  
123.92  
123.68  
123.63  
120.85  
116.25  
114.17  
113.05  
111.64  
100.88  
98.68

55.12  
40.12  
39.91  
39.70  
39.49  
39.29  
39.08  
38.87

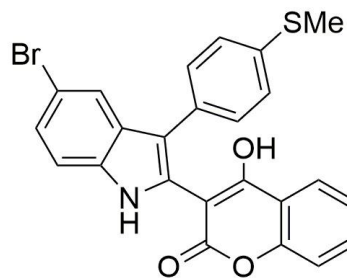

4m

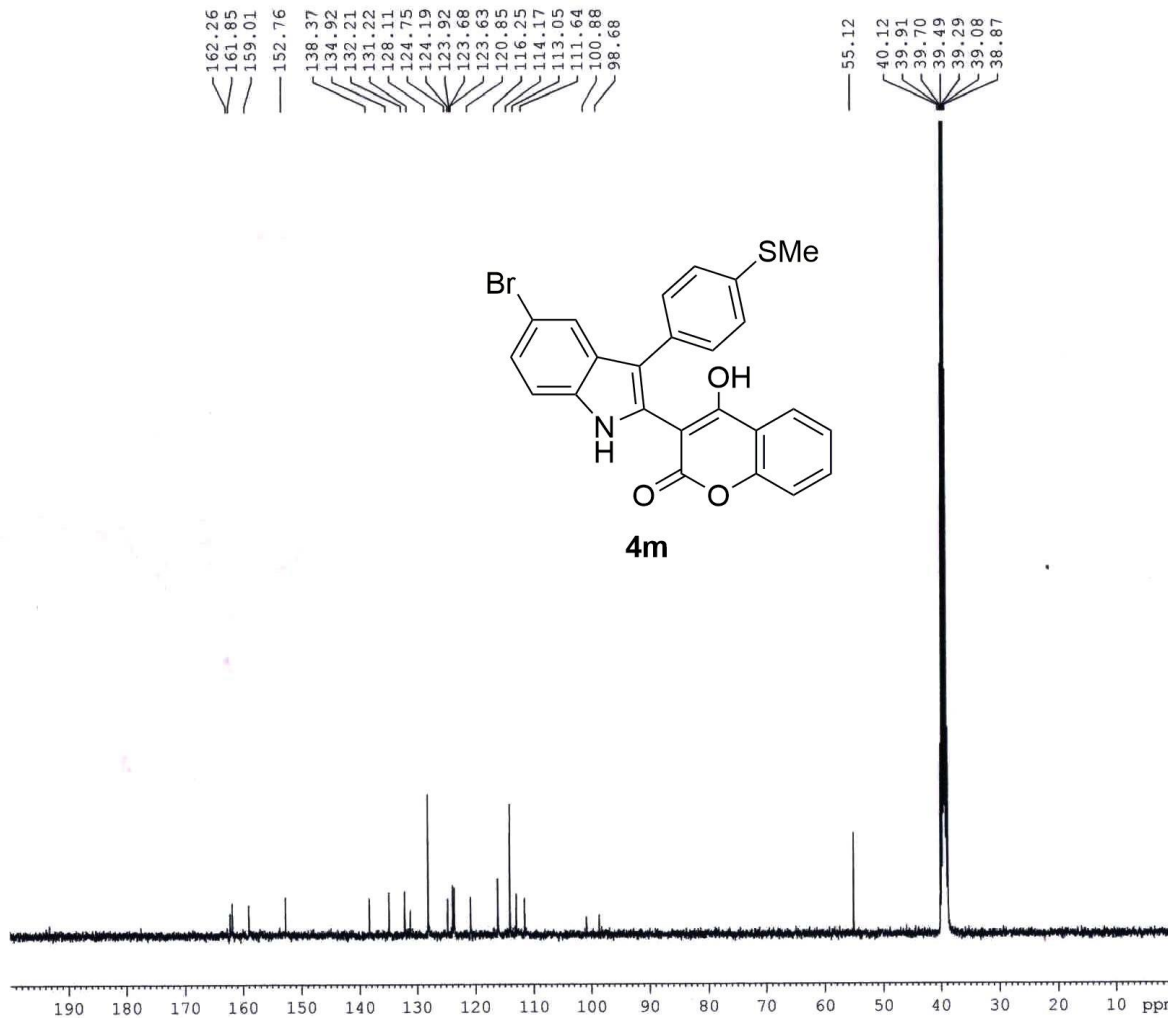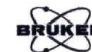

Current Data Parameters  
NAME Dr. A MAJEE 2021  
EXPNO 32  
PROCNO 1

F2 - Acquisition Parameters  
Date\_ 20210113  
Time 15.11  
INSTRUM spect  
PROBHD 5 mm PABBO BB/  
PULPROG zgpg30  
TD 32768  
SOLVENT DMSO  
NS 1024  
DS 2  
SWH 24038.461 Hz  
FIDRES 0.733596 Hz  
AQ 0.6815744 sec  
RG 87.66  
DW 20.800 usec  
DE 6.50 usec  
TE 295.9 K  
D1 2.00000000 sec  
D11 0.03000000 sec  
TD0 1

----- CHANNEL f1 -----  
SFO1 100.6278588 MHz  
NUC1 13C  
P1 8.90 usec  
PLW1 54.00000000 W

----- CHANNEL f2 -----  
SFO2 400.1516006 MHz  
NUC2 1H  
CPDPRG12 waltz16  
PCPD2 90.00 usec  
PLW2 12.00000000 W  
PLW12 0.32231000 W  
PLW13 0.16212000 W

F2 - Processing parameters  
SI 16384  
SF 100.6178440 MHz  
WDW EM  
SSB 0  
LB 1.00 Hz  
GB 0  
PC 1.40

1H of VBSAS-200/18

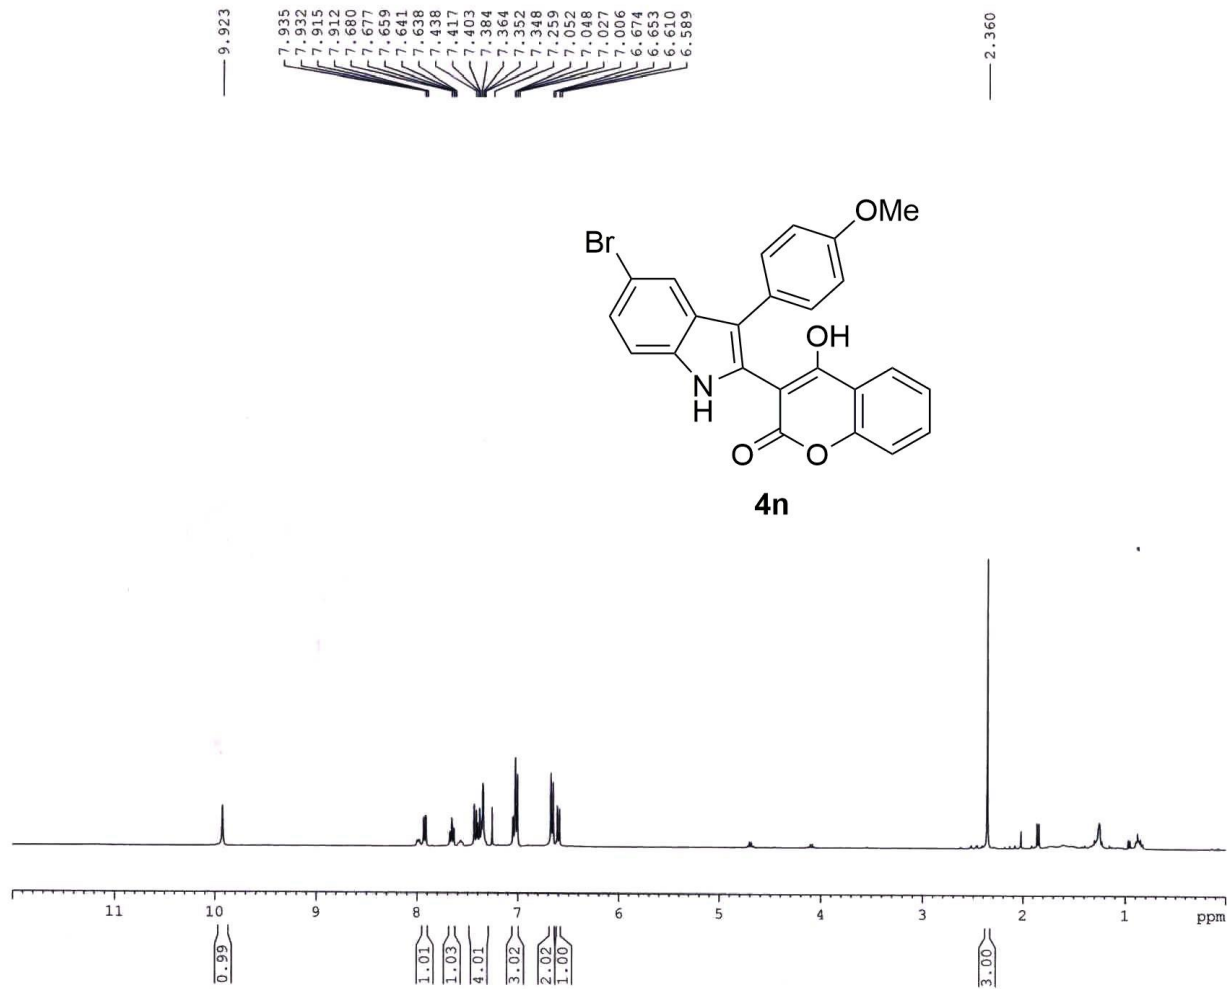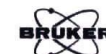

Current Data Parameters  
NAME Dr. A MAJEE 2021  
EXPNO 82  
PROCNO 1

F2 - Acquisition Parameters  
Date\_ 20210209  
Time 18.00  
INSTRUM spect  
PROBHD 5 mm PABBO BB/  
PULPROG zg30  
TD 32768  
SOLVENT CDCl3  
NS 8  
DS 1  
SWH 8223.685 Hz  
FIDRES 0.250967 Hz  
AQ 1.9922944 sec  
RG 120.16  
DW 60.800 usec  
DE 6.50 usec  
TE 295.1 K  
D1 1.00000000 sec  
TD0 1

===== CHANNEL f1 =====  
SFO1 400.1524711 MHz  
NUC1 1H  
P1 14.75 usec  
PLW1 12.00000000 W

F2 - Processing parameters  
SI 16384  
SF 400.1500092 MHz  
WDW EM  
SSB 0  
LB 0.30 Hz  
GB 0  
PC 2.00

13C of VBSAS-200/18

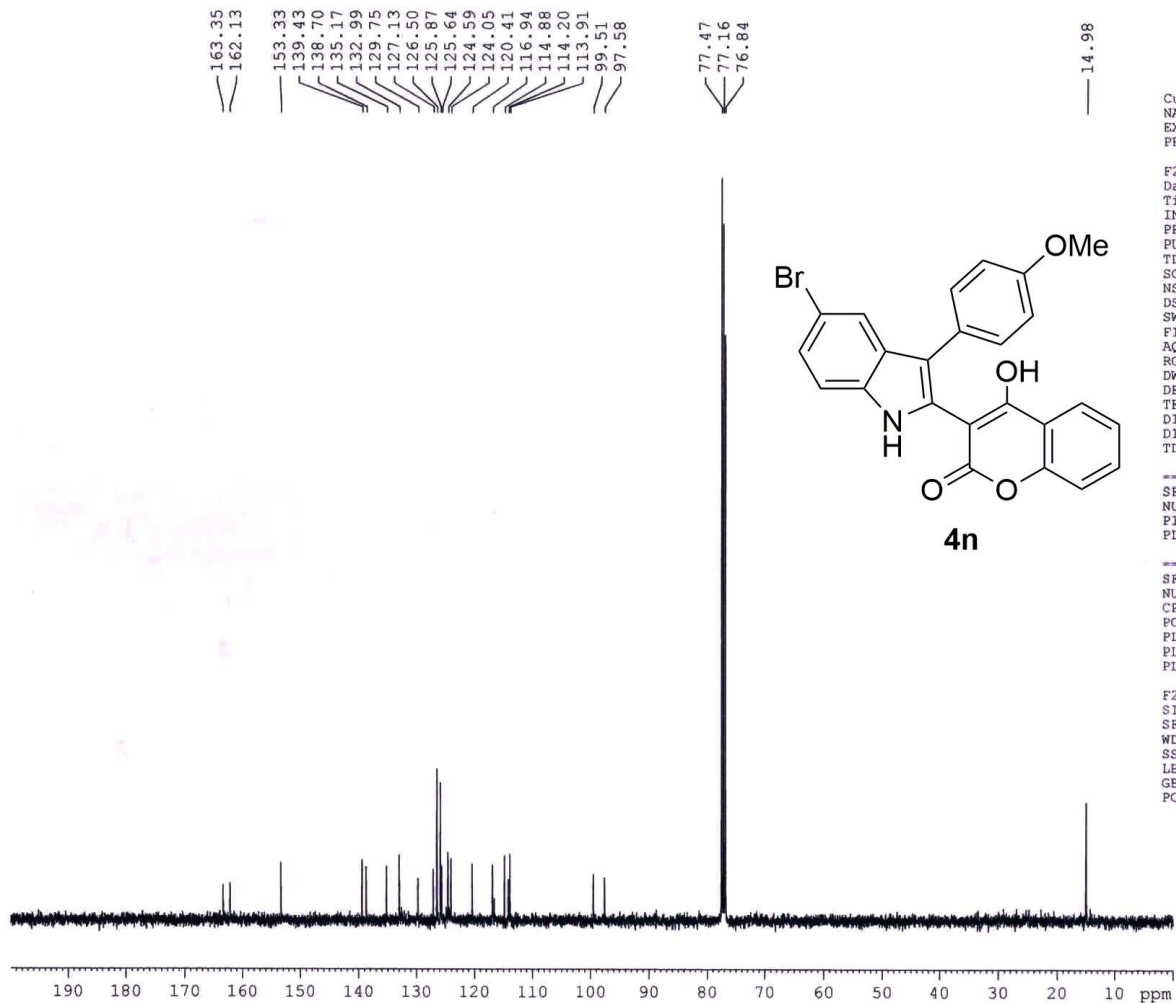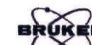

Current Data Parameters  
NAME Dr. A MAJEE 2021  
EXPNO 83  
PROCNO 1

F2 - Acquisition Parameters  
Date\_ 20210209  
Time 18.17  
INSTRUM spect  
PROBHD 5 mm PABBO BB/  
PULPROG zgpg30  
TD 32768  
SOLVENT CDCl3  
NS 320  
DS 2  
SWH 24038.461 Hz  
FIDRES 0.733596 Hz  
AQ 0.6815744 sec  
RG 120.16  
DW 20.800 usec  
DE 6.50 usec  
TE 295.5 K  
D1 2.0000000 sec  
D11 0.0300000 sec  
TD0 1

----- CHANNEL f1 -----  
SFO1 100.6278588 MHz  
NUC1 13C  
P1 8.90 usec  
PLW1 54.0000000 W

----- CHANNEL f2 -----  
SFO2 400.1516006 MHz  
NUC2 1H  
CPDPRG[2] waltz16  
PCPD2 90.00 usec  
PLW2 12.0000000 W  
PLW12 0.32231000 W  
PLW13 0.16212000 W

F2 - Processing parameters  
SI 16384  
SF 100.6177858 MHz  
WDW EM  
SSB 0  
LB 1.00 Hz  
GB 0  
PC 1.40



1H of VBSAS-200/16-D

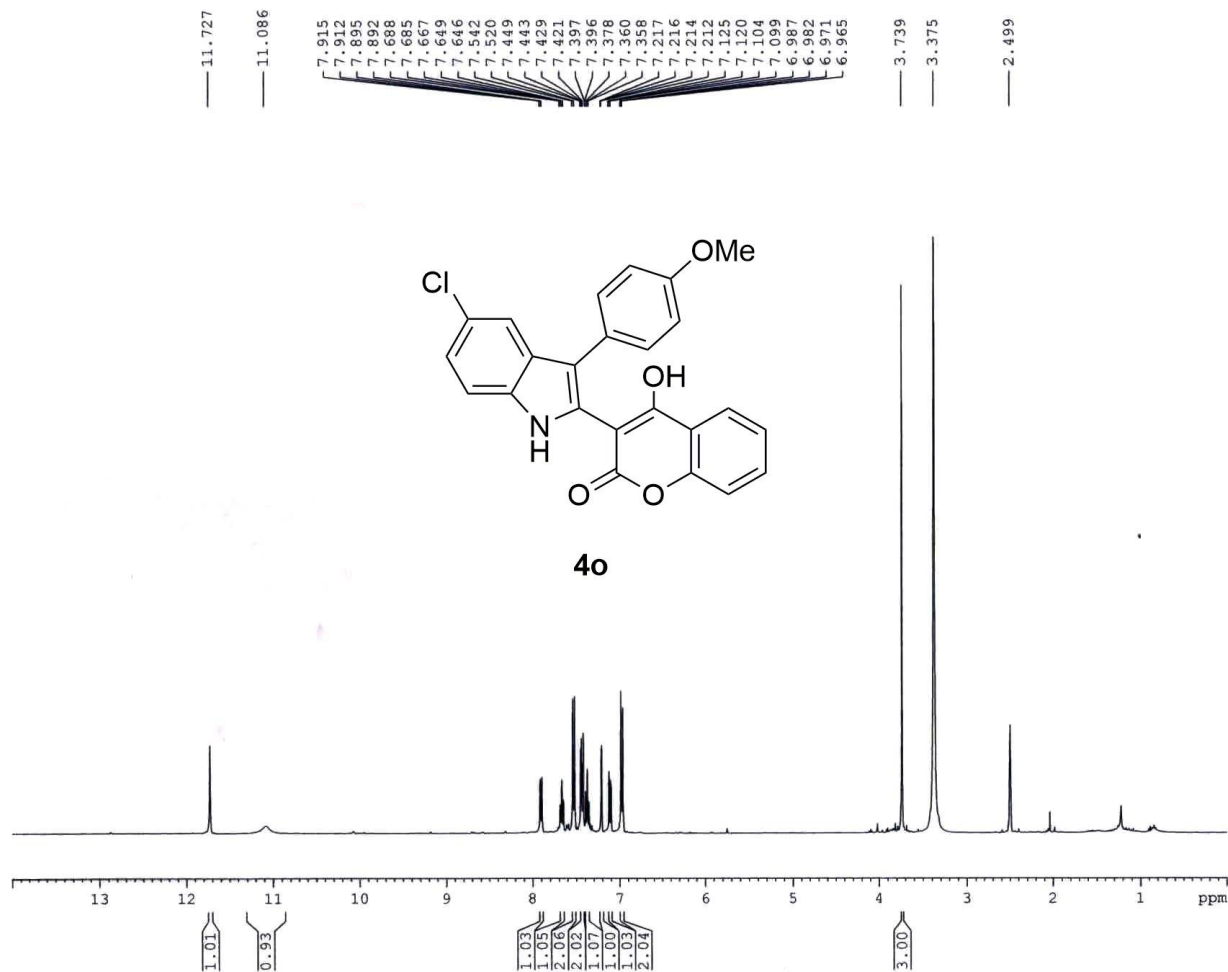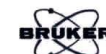

Current Data Parameters  
NAME Dr. A MAJEE 2021  
EXPNO 33  
PROCNO 1

F2 - Acquisition Parameters  
Date\_ 20210113  
Time\_ 16.27  
INSTRUM spect  
PROBHD 5 mm PABBO BB/  
PULPROG zg30  
TD 32768  
SOLVENT DMSO  
NS 8  
DS 1  
SWH 8223.685 Hz  
FIDRES 0.250967 Hz  
AQ 1.9922944 sec  
RG 87.66  
DW 60.800 usec  
DE 6.50 usec  
TE 294.1 K  
D1 1.00000000 sec  
TDO 1

===== CHANNEL f1 =====  
SFO1 400.1524711 MHz  
NUC1 1H  
P1 14.75 usec  
PLW1 12.00000000 W

F2 - Processing parameters  
SI 16384  
SF 400.1500016 MHz  
WDW EM  
SSB 0  
LB 0.30 Hz  
GB 0  
PC 2.00

13C of VBSAS-200/16-D

162.24  
161.86  
159.02  
152.76  
138.58  
134.69  
132.22  
130.55  
128.59  
128.11  
124.81  
123.94  
123.70  
121.11  
117.87  
116.26  
116.22  
114.18  
112.59  
100.98  
98.72

55.13  
40.11  
39.90  
39.70  
39.49  
39.28  
39.07  
38.86

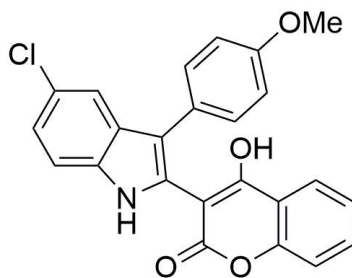

4o

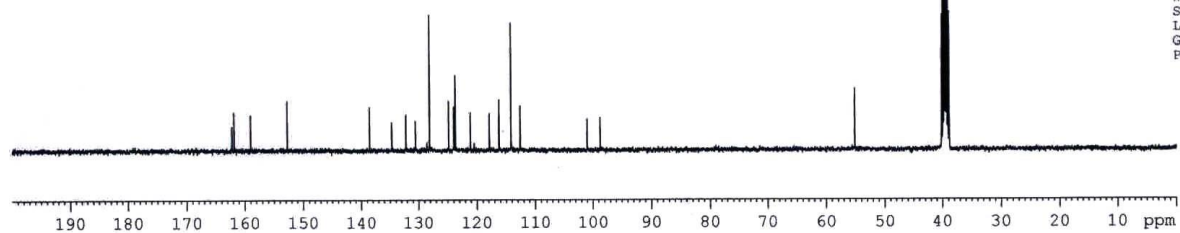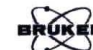

Current Data Parameters  
NAME Dr. A MAJEE 2021  
EXPNO 34  
PROCNO 1

F2 - Acquisition Parameters  
Date\_ 20210113  
Time\_ 17.16  
INSTRUM spect  
PROBHD 5 mm PABBO BB/  
PULPROG zgpg30  
TD 32768  
SOLVENT DMSO  
NS 1024  
DS 2  
SWH 24038.461 Hz  
FIDRES 0.733596 Hz  
AQ 0.6615744 sec  
RG 87.66  
DW 20.800 usec  
DE 6.50 usec  
TE 294.1 K  
D1 2.0000000 sec  
D11 0.0300000 sec  
TDO 1

===== CHANNEL f1 =====  
SFO1 100.6278588 MHz  
NUC1 13C  
P1 8.90 usec  
PLW1 54.0000000 W

===== CHANNEL f2 =====  
SFO2 400.1516006 MHz  
NUC2 1H  
CPDPRG12 waltz16  
PCPD2 90.00 usec  
PLW2 12.0000000 W  
PLW12 0.32231000 W  
PLW13 0.16212000 W

F2 - Processing parameters  
SI 16384  
SF 100.6178425 MHz  
WDW EM  
SSB 0  
LB 1.00 Hz  
GB 0  
PC 1.40
